# Supplementary material for: Association of gestational diabetes mellitus with overall and type specific cardiovascular and cerebrovascular diseases: systematic review and meta-analysis
Source: PubMed Central journal article supplement — BMJ. 2022 Sep 21;378:e070244. doi: 10.1136/bmj-2022-070244 (PMC9490552; doi:10.1136/bmj-2022-070244), 2022-09-21
Supplement: xiew070244.ww.pdf [file xiew070244.ww.pdf]

## Supplementary File

### SUPPLEMENTARY APPENDIX

**Table S1.** Characteristics of the studies included in the meta-analysis.

**Table S2.** Risk-of-bias summary for the studies included in the meta-analysis, using Cochrane risk-of-bias tool ROBINS-I.

**Table S3.** Certainty of evidence and summary effect estimates assessed by GRADE (grading of recommendations, assessment, development, and evaluation) of the study outcomes.

**Table S4.** Subgroup analyses of the association between gestational diabetes mellitus and overall cardiovascular diseases, according to study characteristics.

**Table S5.** Subgroup analyses of the association between gestational diabetes mellitus and overall cardiovascular diseases, according to a variety of adjustments.

**Figure S1.** Forest plot of risk ratio of overall cardiovascular and cerebrovascular diseases in women with a history of gestational diabetes mellitus.

**Figure S2.** Forest plot of risk ratio of cardiovascular diseases in women with a history of gestational diabetes mellitus.

**Figure S3.** Forest plot of risk ratio of cerebrovascular diseases in women with a history of gestational diabetes mellitus.

**Figure S4.** Sensitivity analysis using the jackknife approach, (A) overall cardiovascular and cerebrovascular diseases, (B) cardiovascular diseases, (C) cerebrovascular diseases.

**Figure S5.** Sensitivity analysis after excluding the case-control study for the outcome of overall cardiovascular and cerebrovascular diseases.

**Figure S6.** Sensitivity analysis after excluding the studies without direct information on the risk estimates for the outcome of overall cardiovascular and cerebrovascular diseases.

**Figure S7.** Funnel plot, (A) overall cardiovascular and cerebrovascular diseases, (B) cardiovascular diseases.

**Figure S8.** Forest plot of risk ratio of coronary artery diseases in women with a history of gestational diabetes mellitus.

**Figure S9.** Forest plot of risk ratio of myocardial infarction in women with a history of gestational diabetes mellitus.

**Figure S10.** Forest plot of risk ratio of heart failure in women with a history of gestational diabetes mellitus.

**Figure S11.** Forest plot of risk ratio of angina pectoris in women with a history of gestational diabetes mellitus.

**Figure S12.** Forest plot of risk ratio of cardiovascular procedures in women with a history of gestational diabetes mellitus.

**Figure S13.** Forest plot of risk ratio of overall stroke in women with a history of gestational diabetes mellitus.

**Figure S14.** Forest plot of risk ratio of ischemic stroke in women with a history of gestational diabetes mellitus.

**Figure S15.** Forest plot of risk ratio of hemorrhagic stroke in women with a history of gestational diabetes mellitus.

**Figure S16.** Forest plot of risk ratio of venous thromboembolism in women with a history of gestational diabetes mellitus.

**Figure S17.** Subgroup analyses of the association between gestational diabetes mellitus and overall cardiovascular and cerebrovascular diseases, according to year of publication.

**Figure S18.** Subgroup analyses of the association between gestational diabetes mellitus and overall cardiovascular and cerebrovascular diseases, according to study location.

**Figure S19.** Subgroup analyses of the association between gestational diabetes mellitus and overall cardiovascular and cerebrovascular diseases, according to study design.

**Figure S20.** Subgroup analyses of the association between gestational diabetes mellitus and overall cardiovascular and cerebrovascular diseases, according to source of data.

**Figure S21.** Subgroup analyses of the association between gestational diabetes mellitus and overall cardiovascular and cerebrovascular diseases, according to follow-up duration.

**Figure S22.** Subgroup analyses of the association between gestational diabetes mellitus and overall cardiovascular and cerebrovascular diseases, according to method of ascertainment of gestational diabetes mellitus.

**Figure S23.** Subgroup analyses of the association between gestational diabetes mellitus and overall cardiovascular and cerebrovascular diseases, according to method of ascertainment of cardiovascular and cerebrovascular diseases.

**Figure S24.** Subgroup analyses of the association between gestational diabetes mellitus and overall cardiovascular and cerebrovascular diseases, according to sample size.

**Figure S25.** Subgroup analyses of the association between gestational diabetes mellitus and overall cardiovascular and cerebrovascular diseases, according to number of events.

**Figure S26.** Subgroup analyses of the association between gestational diabetes mellitus and overall cardiovascular and cerebrovascular diseases, according to risk-of-bias (ROBINS-I).

**Figure S27.** Subgroup analyses of the association between gestational diabetes mellitus and overall cardiovascular and cerebrovascular diseases, according to adjustment of

race.

**Figure S28.** Subgroup analyses of the association between gestational diabetes mellitus and overall cardiovascular and cerebrovascular diseases, according to adjustment of smoking.

**Figure S29.** Subgroup analyses of the association between gestational diabetes mellitus and overall cardiovascular and cerebrovascular diseases, according to adjustment of body mass index.

**Figure S30.** Subgroup analyses of the association between gestational diabetes mellitus and overall cardiovascular and cerebrovascular diseases, according to adjustment of socio-economic status.

**Figure S31.** Subgroup analyses of the association between gestational diabetes mellitus and overall cardiovascular and cerebrovascular diseases, according to adjustment of education level.

**Figure S32.** Subgroup analyses of the association between gestational diabetes mellitus and overall cardiovascular and cerebrovascular diseases, according to adjustment of parity.

**Figure S33.** Subgroup analyses of the association between gestational diabetes mellitus and overall cardiovascular and cerebrovascular diseases, according to adjustment of comorbidities.

**Figure S34.** Subgroup analyses of the association between gestational diabetes mellitus and overall cardiovascular and cerebrovascular diseases, according to adjustment of pregnancy complications.

**Appendix S1.** Study protocol.

**Appendix S2.** Protocol deviations

**Appendix S3.** Search strategy.

**Appendix S4.** Description and decision criteria for each domain in ROBINS-I

**Appendix S5.** List of excluded studies

**Table S1.** Characteristics of the studies included in the meta-analysis.

| Author   | Year | Country | Data source                                               | Design                     | Setting     | Enroll period | summary of followup | Group         | No. patients | Age (years), mean (SD) | White, %                  | Smoker, % | BMI category                                      | Hypertension, % | Dyslipidemia, % | socioeconomic status | education level             | parity   | Pre-eclampsia or eclampsia, %                                     |
|----------|------|---------|-----------------------------------------------------------|----------------------------|-------------|---------------|---------------------|---------------|--------------|------------------------|---------------------------|-----------|---------------------------------------------------|-----------------|-----------------|----------------------|-----------------------------|----------|-------------------------------------------------------------------|
| Carr     | 2006 | USA     | GENetics of Non-Insulin dependent Diabetes (GENNID) study | retrospective cohort       | multicenter | 1993-2001     | NR                  | GD M women    | 332          | 52.4±0.6               | 30.5                      | 41%       | 33.7 ± 0.6                                        | 46.8            | 33.9            |                      | beyond high school 31.7%    |          |                                                                   |
|          |      |         |                                                           |                            |             |               |                     | control women | 653          | 48.6±0.7               | 25                        | 43.80%    | 34.4 ± 1.2                                        | 37              | 26.3            |                      | beyond high school 36.3%    |          |                                                                   |
| Kessouss | 2013 | Israel  | Soroka University Medical Center                          | retrospective cohort       | mono-center | 1988-1999     | 0.1% death          | GD M women    | 4928         | 32.4±6                 | Jewish67.7<br>Bedouin32.3 | NA        | NA                                                | NA              | NA              |                      |                             |          |                                                                   |
|          |      |         |                                                           |                            |             |               |                     | control women | 4298         | 29.4 ±6                | Jewish72.6<br>Bedouin27.4 | NA        | NA                                                | NA              | NA              |                      |                             |          |                                                                   |
| Fadl     | 2014 | Sweden  | National Swedish registry                                 | retrospective case-control | nationwide  | 1991-2008     | 0% lost followup    | CV D women    | 2639         | 40.7±7.3               | 85.8                      | 35.30%    | <18.5 2.3%, 18.5-24 55.7%, 25-29 26%, >30 16%     | 2.1             | NA              |                      | lower education level 23.4% | 2.44±1.2 | mediating factor and therefore data are not shown in the analysis |
|          |      |         |                                                           |                            |             |               |                     | control women | 1331         | 40.7±7.3               | 88.6                      | 18.10%    | <18.5 2.5%, 18.5-24 67.2%, 25-29, 22.4%, >30 7.9% | 0.3             | NA              |                      | lower education level 15.1% | 2.62±1.2 |                                                                   |
| Savitz   | 2014 | USA     | New York City administrative databases                    | retrospective cohort       | multicenter | 1995-2004     | NR                  | GD M women    | 43169        | NA                     | NA                        | NA        | NA                                                | NA              | NA              |                      |                             |          |                                                                   |
|          |      |         |                                                           |                            |             |               |                     | control       | 8064         | NA                     | NA                        | NA        | NA                                                | NA              | NA              | NA                   |                             |          |                                                                   |

|            |      |        |                                             |                      |             |           |                                                           |               |         |                  |      |      |                                                                                                                     |      |     |              |  |                   |     |
|------------|------|--------|---------------------------------------------|----------------------|-------------|-----------|-----------------------------------------------------------|---------------|---------|------------------|------|------|---------------------------------------------------------------------------------------------------------------------|------|-----|--------------|--|-------------------|-----|
|            |      |        |                                             |                      |             |           |                                                           | women         | 70      |                  |      |      |                                                                                                                     |      |     |              |  |                   |     |
| Kaul       | 2015 | Canada | Alberta provincial administrative databases | retrospective cohort | multicenter | 1999-2010 | 8.5% lost to followup due to migration                    | GD M women    | 8731    | 31.8±5.46        | 70.3 | 16.6 | Overweight: 16.0%                                                                                                   | 0    | NA  | Q1 24.55%    |  | Nulliparity 58.1% | 3.7 |
|            |      |        |                                             |                      |             |           |                                                           | control women | 213765  | 28.6±5.58        | 83.5 | 19.8 | Overweight: 7.6%                                                                                                    | 0    | NA  | Q1 26.15%    |  | Nulliparity 64.9% | 2.2 |
| Goueslard  | 2016 | France | French administrative databases             | retrospective cohort | nationwide  | 2007-2008 | NR                                                        | GD M women    | 62958   | age 20-39 91.16% | NA   | NA   | obesity (BMI≥30) 12.9%                                                                                              | 7.68 | NA  |              |  |                   |     |
|            |      |        |                                             |                      |             |           |                                                           | control women | 1452429 | age20-39 93.87%  | NA   | NA   | obesity (BMI≥30) 3.87%                                                                                              | 2.89 | NA  |              |  |                   |     |
| Retnakaran | 2017 | Canada | Ontario provincial administrative databases | retrospective cohort | multicenter | 1994-2014 | no loss to follow-up                                      | GD M women    | 56884   | 32 (29-36)       | NA   | NA   | NA                                                                                                                  | 5    | 4.2 | lowest 26.4% |  |                   |     |
|            |      |        |                                             |                      |             |           |                                                           | control women | 1408798 | 30 (26-34)       | NA   | NA   | NA                                                                                                                  | 2    | 1.8 | lowest 28.2% |  |                   |     |
| Tobias     | 2017 | USA    | Nurses' Health                              | prospective cohort   | nationwide  | 1989      | more than 90% of eligible participants complete follow-up | GD M women    | 78751   | 33.8±4.4         | 89   | 34   | Normal weight (<25.0) 88% ; Overweight/obese (≥25.0) 12% Baseline BMI : Normal weight (<25.0) 55% ; Overweight: 25% | 21   | NA  |              |  | 1.8±1.1           |     |

|                              |          |            |                                  |                             |                 |                       |                                    |                          |             |                                                  |      |    |                                                                                                                                                                                                                                               |      |    |                                                               |    |                                 |         |  |
|------------------------------|----------|------------|----------------------------------|-----------------------------|-----------------|-----------------------|------------------------------------|--------------------------|-------------|--------------------------------------------------|------|----|-----------------------------------------------------------------------------------------------------------------------------------------------------------------------------------------------------------------------------------------------|------|----|---------------------------------------------------------------|----|---------------------------------|---------|--|
|                              |          |            | Study II                         |                             |                 |                       |                                    |                          |             |                                                  |      |    |                                                                                                                                                                                                                                               |      |    |                                                               |    |                                 |         |  |
|                              |          |            |                                  |                             |                 |                       |                                    | cont<br>rol<br>wom<br>en | 9587<br>75  | 34.9±4.<br>7                                     | 92   | 34 | Obese: 20%<br><br>prepregnanc<br>y BMI :<br>Normal<br>weight<br>(<25.0)<br>92% ;<br>Overweight/<br>obese<br>(≥25.0) 8%<br>Baseline<br>BMI :<br>Normal<br>weight<br>(<25.0)<br>71% ;<br>Overweight<br>(25-29.9)<br>19% ;<br>obese (≥30)<br>10% | 10   | NA |                                                               |    |                                 | 1.9±1.2 |  |
| Daly                         | 20<br>18 | UK         | primary-<br>care<br>database     | retrospe<br>ctive<br>cohort | nationw<br>ide  | 199<br>0-<br>201<br>6 | NR                                 | GD<br>M<br>wom<br>en     | 9112        | 33±5.4                                           | 30.7 | 35 | BMI < 25<br>26%; 25-30<br>24%; >30<br>39%                                                                                                                                                                                                     | 2.54 | NA | economic<br>ally<br>deprived<br>( Q4 +<br>Q5 )<br>20%+17<br>% |    |                                 |         |  |
|                              |          |            |                                  |                             |                 |                       |                                    | cont<br>rol<br>wom<br>en | 3727<br>7   | 33±5.4                                           | 40   | 36 | BMI < 25<br>50%; 25-30<br>21%; >30<br>14%                                                                                                                                                                                                     | 1.16 | NA | economic<br>ally<br>deprived<br>( Q4 +<br>Q5 )<br>18%+13<br>% |    |                                 |         |  |
| McKen<br>zie-<br>Samps<br>on | 20<br>18 | Canad<br>a | Quebec<br>provincial<br>registry | retrospe<br>ctive<br>cohort | multice<br>nter | 198<br>9-<br>200<br>3 | 4701 deaths<br>during the<br>study | GD<br>M<br>wom<br>en     | 6735<br>6   | age 20-<br>29<br>59.5%<br>age 30-<br>39<br>33.1% | NA   | NA | NA                                                                                                                                                                                                                                            | NA   | NA | disadvant<br>age<br>18.7%                                     | NA | 1 45.4%<br>2 40.1%<br>> 2 14.5% | 5.5     |  |
|                              |          |            |                                  |                             |                 |                       |                                    | cont<br>rol<br>wom<br>en | 1003<br>311 |                                                  | NA   | NA | NA                                                                                                                                                                                                                                            | NA   | NA |                                                               |    |                                 |         |  |

|                 |      |         |                                                                            |                      |             |           |                                         |               |        |                                    |                                                              |                                                                                    |                                                                                          |      |       |                                                     |                                 |                                    |     |
|-----------------|------|---------|----------------------------------------------------------------------------|----------------------|-------------|-----------|-----------------------------------------|---------------|--------|------------------------------------|--------------------------------------------------------------|------------------------------------------------------------------------------------|------------------------------------------------------------------------------------------|------|-------|-----------------------------------------------------|---------------------------------|------------------------------------|-----|
| Kabootari       | 2019 | Iran    | the Tehran Lipid and Glucose Study                                         | prospective cohort   | multicenter | 1999-2001 | Response rate of 85.8%                  | GD M women    | 477    | 45.3±9.4                           | NA                                                           | 5.5                                                                                | 30.5 ± 4.9                                                                               | 28.5 | 64.6  | NA                                                  | lower education level 47.8%     | 4(3-5)                             | 0.0 |
|                 |      |         |                                                                            |                      |             |           |                                         | control women | 3831   | 40.8±11.2                          | NA                                                           | 4.8                                                                                | 28.0 ± 4.7                                                                               | 19.7 | 55.4  | NA                                                  | lower education level 38.6%     | 3(2-4)                             | 0.0 |
| Echouf-Tcheugui | 2021 | Canada  | Ontario provincial administrative databases                                | retrospective cohort | multicenter | 2007-2018 | no loss to follow-up                    | GD M women    | 50193  | 32.32±5.28                         | Chinese 9.4%<br>General population 81.5%<br>South Asian 9.0% | NA                                                                                 | NA                                                                                       | 4.8  | NA    | 1 27.4%<br>2 21.9%<br>3 20.5%<br>4 17.9%<br>5 11.9% | 0 60.9%<br>1:23.5%<br>>=2 15.7% | Preeclampsia 10.0%                 |     |
|                 |      |         |                                                                            |                      |             |           |                                         | control women | 856126 | 29.59±5.56                         | Chinese 5.7%<br>General population 90%<br>South Asian 4.3%   | NA                                                                                 | NA                                                                                       | 2    | NA    | 1 22.7%<br>2 20.5%<br>3 20.4%<br>4 20.4%<br>5 15.7% | 0 66.0%<br>1 21.9%<br>>=2 12.1% | Preeclampsia 5.7%                  |     |
| Sun             | 2021 | Korea   | reimbursement claims database of Korea's National Health Insurance Service | prospective cohort   | nationwide  | NA        | 6374 deaths during the study            | GD M women    | 159066 | age 20-29 45.5%<br>age 30-39 53.1% | yellow race dominated                                        | Non-smokers 91.96%<br>Past smokers 2.39%<br>Current smokers 2.33%<br>Missing 3.32% | Underweight 15.57%<br>Normal 64.94%<br>Overweight 11.14%<br>Obese 8.31%<br>Missing 0.04% | 7.34 | 11.53 | low income 22.7%                                    | 1 85.5%<br>2 14.3%              | Preeclampsia or hypertension 7.34% |     |
|                 |      |         |                                                                            |                      |             |           |                                         | control women | 134102 | age 20-29 50.1%<br>age 30-39 48.8% | yellow race dominated                                        |                                                                                    |                                                                                          | 4.56 | 7.48  | low income 22.9%                                    | 1 85/6%<br>2 14.31%             | Preeclampsia or hypertension 4.56% |     |
| Yu              | 2021 | Denmark | Danish national registry                                                   | prospective cohort   | nationwide  | 1978-2016 | censored due to noncardiovascular death | GD M women    | 21353  | age 20-29 60%<br>age 30-34 25%     | dominantly                                                   | 17%                                                                                | Pre-pregnancy Obesity 18%                                                                | NA   | NA    | lower education level 25%                           | 1 24%<br>2 45%<br>> 2 31%       |                                    |     |

|     |      |    |            |                    |            |           |                                        |                  |        |                                |            |     |                          |    |    |  |                           |                           |  |
|-----|------|----|------------|--------------------|------------|-----------|----------------------------------------|------------------|--------|--------------------------------|------------|-----|--------------------------|----|----|--|---------------------------|---------------------------|--|
|     |      |    |            |                    |            |           | (n = 9,989) or emigration (n =27,350). | control women    | 981133 | age 20-29 69%<br>age 30-34 20% | dominantly | 18% | Pre-pregnancy Obesity 4% | NA | NA |  | lower education level 25% | 1 28%<br>2 50%<br>> 2 23% |  |
| Lee | 2022 | UK | UK Biobank | prospective cohort | nationwide | 2006-2010 | NR                                     | GD<br>M<br>women | 219330 | NA                             | NA         | NA  | NA                       | NA | NA |  |                           |                           |  |
|     |      |    |            |                    |            |           |                                        | control women    |        | NA                             | NA         | NA  | NA                       | NA | NA |  |                           |                           |  |



**Table S2.** Risk-of-bias summary for the studies included in the meta-analysis, using Cochrane risk-of-bias tool ROBINS-I.

| <b>Study</b>          | <b>Bias due to confounding</b> | <b>Bias due to selection of participants</b> | <b>Bias due to exposure assessment</b> | <b>Bias due to misclassification during follow-up</b> | <b>Bias due to missing data</b> | <b>Bias due to measurement of the outcome</b> | <b>Bias due to selective reporting of the results</b> | <b>Overall judgement</b> |
|-----------------------|--------------------------------|----------------------------------------------|----------------------------------------|-------------------------------------------------------|---------------------------------|-----------------------------------------------|-------------------------------------------------------|--------------------------|
| Carr, 16              | Serious                        | Serious                                      | Serious                                | No information                                        | No information                  | Serious                                       | Moderate                                              | Serious                  |
| Kessous, 17           | Serious                        | Moderate                                     | Low                                    | No information                                        | No information                  | Moderate                                      | Low                                                   | Serious                  |
| Fadl, 18              | Moderate                       | Low                                          | Low                                    | No information                                        | Moderate                        | Moderate                                      | Low                                                   | Moderate                 |
| Savitz, 19            | Moderate                       | Low                                          | Moderate                               | No information                                        | No information                  | Moderate                                      | Low                                                   | Moderate                 |
| Kaul, 20              | Moderate                       | Serious                                      | Low                                    | No information                                        | Low                             | Moderate                                      | Low                                                   | Serious                  |
| Goueslard, 21         | Serious                        | Low                                          | Moderate                               | No information                                        | Moderate                        | Moderate                                      | Low                                                   | Serious                  |
| Retnakaran, 7         | Serious                        | Low                                          | Moderate                               | No information                                        | Low                             | Moderate                                      | Low                                                   | Serious                  |
| Tobias, 22            | Moderate                       | Low                                          | Moderate                               | No information                                        | Moderate                        | Moderate                                      | Low                                                   | Moderate                 |
| Daly, 23              | Moderate                       | Low                                          | Moderate                               | No information                                        | Low                             | Moderate                                      | Low                                                   | Moderate                 |
| McKenzie-Sampson, 24  | Serious                        | Low                                          | Moderate                               | No information                                        | No information                  | Moderate                                      | Low                                                   | Serious                  |
| Kabootari, 25         | Serious                        | Low                                          | Serious                                | No information                                        | Low                             | Moderate                                      | Low                                                   | Serious                  |
| Echouffo-Tcheugui, 26 | Moderate                       | Low                                          | Moderate                               | No information                                        | Low                             | Moderate                                      | Low                                                   | Moderate                 |
| Sun, 27               | Serious                        | Low                                          | Moderate                               | No information                                        | Low                             | Moderate                                      | Low                                                   | Serious                  |
| Yu, 28                | Moderate                       | Low                                          | Moderate                               | No information                                        | Low                             | Moderate                                      | Low                                                   | Moderate                 |
| Lee, 29               | Moderate                       | Low                                          | Moderate                               | No information                                        | Low                             | Moderate                                      | Low                                                   | Moderate                 |

**Table S3.** Certainty of evidence and summary effect estimates assessed by GRADE (grading of recommendations, assessment, development, and evaluation) of the study outcomes.

| Outcomes                                            | Summary of findings |                   | Quality assessment |                |               |              |                                                                        | Certainty of evidence <sup>#</sup> |
|-----------------------------------------------------|---------------------|-------------------|--------------------|----------------|---------------|--------------|------------------------------------------------------------------------|------------------------------------|
|                                                     | No. studies         | RR (95%CI)        | Study design*      | Inconsistency† | Indirectness‡ | Imprecision§ | Other consideration                                                    |                                    |
| Overall cardiovascular and cerebrovascular diseases | 14                  | 1.45 (1.36, 1.53) | serious            | not serious    | not serious   | not serious  | attenuation of the pooled RR by stratifying overt diabetes development | ⊕⊕00<br>LOW                        |
| cardiovascular diseases                             | 12                  | 1.72 (1.40, 2.11) | serious            | serious        | not serious   | not serious  | none                                                                   | ⊕000<br>VERY LOW                   |
| coronary artery diseases                            | 4                   | 1.40 (1.18, 1.65) | serious            | not serious    | not serious   | not serious  | none                                                                   | ⊕000<br>VERY LOW                   |
| myocardial infarction                               | 6                   | 1.74 (1.37, 2.20) | serious            | serious        | not serious   | not serious  | none                                                                   | ⊕000<br>VERY LOW                   |
| angina pectoris                                     | 3                   | 2.27 (1.79, 2.87) | serious            | serious        | not serious   | not serious  | large effect size (RR > 2)                                             | ⊕000<br>VERY LOW                   |
| heart failure                                       | 6                   | 1.62 (1.29, 2.05) | serious            | serious        | not serious   | not serious  | none                                                                   | ⊕000<br>VERY LOW                   |
| cardiovascular procedures                           | 4                   | 1.87 (1.34, 2.62) | serious            | serious        | not serious   | not serious  | none                                                                   | ⊕000<br>VERY LOW                   |
| cerebrovascular diseases                            | 9                   | 1.40 (1.29, 1.51) | serious            | not serious    | not serious   | not serious  | none                                                                   | ⊕000<br>VERY LOW                   |
| overall stroke                                      | 6                   | 1.45 (1.29, 1.63) | serious            | not serious    | not serious   | not serious  | none                                                                   | ⊕000<br>VERY LOW                   |
| ischemic stroke                                     | 5                   | 1.49 (1.29, 1.71) | serious            | not serious    | not serious   | not serious  | none                                                                   | ⊕000<br>VERY LOW                   |
| hemorrhagic stroke                                  | 2                   | 1.44 (1.16, 1.78) | serious            | not serious    | not serious   | not serious  | none                                                                   | ⊕000<br>VERY LOW                   |
| venous thromboembolism                              | 4                   | 1.28 (1.13, 1.46) | serious            | not serious    | not serious   | not serious  | none                                                                   | ⊕000<br>VERY LOW                   |

\*Downgraded by one level if >25% of participants in this comparison were from studies at high risk of bias.

†Downgraded by one level if heterogeneity ( $I^2$ ) >50%.

‡Downgraded by one level if >25% of included studies were monocenter-based.

§Downgraded by one level if the limits of the 95% CI for risk estimates are wide or cross a minimally important difference of 10% for outcomes (RR 0.9-1.1).

#High quality: very confident that the true effect lies close to that of the estimate of the effect; moderate quality: moderately confident in the effect estimate, and the true effect is likely to be close to the estimate of the effect, but there is a possibility that it is substantially different; low quality: confidence in the effect estimate is limited, and the true effect could be substantially different from the estimate of the effect; very low quality: very little confidence in the effect estimate, and the true effect is likely to be substantially different from the estimate of effect.

**Table S4.** Subgroup analyses of the association between gestational diabetes mellitus and overall cardiovascular diseases, according to study characteristics.

| Study characteristics      | No. study | Risk ratio (95%CI) | I <sup>2</sup> (%) | τ <sup>2</sup> | P for within groups | P for between groups |
|----------------------------|-----------|--------------------|--------------------|----------------|---------------------|----------------------|
| <i>All studies</i>         | 12        | 1.72 (1.40, 2.11)  | 91                 | 0.1029         | /                   | /                    |
| <i>Year of publication</i> |           |                    |                    |                |                     |                      |
| before 2017                | 4         | 1.72 (1.48, 2.00)  | 0                  | 0              | <0.0001             | 0.912                |
| after 2017                 | 8         | 1.74 (1.32, 2.29)  | 94                 | 0.1266         |                     |                      |
| <i>Study location</i>      |           |                    |                    |                |                     |                      |
| North America              | 5         | 1.75 (1.41, 2.17)  | 54                 | 0.0286         | <0.0001             | 0.464                |
| Europe                     | 4         | 2.00 (1.31, 3.08)  | 94                 | 0.1637         |                     |                      |
| Asia                       | 3         | 1.40 (1.10, 1.79)  | 62                 | 0.0291         |                     |                      |
| <i>Study design</i>        |           |                    |                    |                |                     |                      |
| retrospective              | 7         | 1.94 (1.74, 2.16)  | 14                 | 0.0034         | <0.0001             | 0.406                |
| prospective                | 5         | 1.54 (1.01, 2.36)  | 96                 | 0.2226         |                     |                      |
| <i>Source of data</i>      |           |                    |                    |                |                     |                      |

|                                              |   |                   |    |        |         |       |
|----------------------------------------------|---|-------------------|----|--------|---------|-------|
| local                                        | 6 | 1.73 (1.41, 2.12) | 59 | 0.0335 | <0.0001 | 0.951 |
| nationwide                                   | 6 | 1.74 (1.21, 2.51) | 95 | 0.1846 |         |       |
| <b><i>Follow-up duration</i></b>             |   |                   |    |        |         |       |
| >10 years                                    | 6 | 1.64 (1.21, 2.21) | 96 | 0.1303 | <0.0001 | 0.543 |
| ≤ 10 years                                   | 5 | 1.79 (1.54, 2.09) | 0  | 0      |         |       |
| <b><i>Method of ascertainment of GDM</i></b> |   |                   |    |        |         |       |
| diagnostic code                              | 8 | 1.82 (1.40, 2.36) | 93 | 0.1113 | <0.0001 | 0.596 |
| self-report                                  | 3 | 1.41 (1.15, 1.72) | 0  | 0      |         |       |
| OGTT                                         | 1 | 1.58 (1.31, 1.92) | /  | /      |         |       |
| <b><i>Method of ascertainment of CVD</i></b> |   |                   |    |        |         |       |
| diagnostic code                              | 9 | 1.83 (1.44, 2.32) | 93 | 0.1056 | <0.0001 | 0.344 |
| others                                       | 3 | 1.41 (1.15, 1.72) | 0  | 0      |         |       |
| <b><i>Sample size</i></b>                    |   |                   |    |        |         |       |
| ≥100,000                                     | 7 | 1.76 (1.34, 2.31) | 94 | 0.1127 | <0.0001 | 0.782 |
| <100,000                                     | 5 | 1.60 (1.30, 1.96) | 28 | 0.0153 |         |       |
| <b><i>Number of events</i></b>               |   |                   |    |        |         |       |
| ≥2,500                                       | 6 | 1.80 (1.34, 2.42) | 95 | 0.1157 | <0.0001 | 0.625 |
| <2500                                        | 6 | 1.57 (1.33, 1.84) | 11 | 0.0047 |         |       |
| <b><i>ROBINS-I</i></b>                       |   |                   |    |        |         |       |
| moderate                                     | 5 | 1.82 (1.20, 2.78) | 93 | 0.1971 |         |       |

|         |   |                   |    |        |         |       |
|---------|---|-------------------|----|--------|---------|-------|
| serious | 7 | 1.65 (1.31, 2.08) | 84 | 0.0672 | <0.0001 | 0.696 |
|---------|---|-------------------|----|--------|---------|-------|

**Table S5.** Subgroup analyses of the association between gestational diabetes mellitus and overall cardiovascular diseases, according to a variety of adjustments.

| Adjustment                   | No. study | Risk ratio (95%CI) | I <sup>2</sup> (%) | $\tau^2$ | P for within groups | P for between groups |
|------------------------------|-----------|--------------------|--------------------|----------|---------------------|----------------------|
| <i>All studies</i>           | 12        | 1.72 (1.40, 2.11)  | 91                 | 0.1029   | /                   | /                    |
| <i>Race</i>                  |           |                    |                    |          |                     |                      |
| Yes                          | 5         | 1.47 (1.29, 1.67)  | 0                  | 0        | <0.0001             | 0.332                |
| No                           | 7         | 1.87 (1.41, 2.48)  | 94                 | 0.1106   |                     |                      |
| <i>Smoking</i>               |           |                    |                    |          |                     |                      |
| Yes                          | 5         | 1.82 (1.20, 2.78)  | 93                 | 0.1971   | <0.0001             | 0.686                |
| No                           | 7         | 1.65 (1.31, 2.08)  | 84                 | 0.0672   |                     |                      |
| <i>Body mass index</i>       |           |                    |                    |          |                     |                      |
| Yes                          | 6         | 1.72 (1.17, 2.52)  | 93                 | 1967     | <0.0001             | 0.950                |
| No                           | 6         | 1.72 (1.35, 2.21)  | 86                 | 0.0679   |                     |                      |
| <i>Socio-economic status</i> |           |                    |                    |          |                     |                      |
| Yes                          | 3         | 1.71 (1.08, 2.72)  | 94                 | 0.13     | <0.0001             | 0.974                |
| No                           | 9         | 1.73 (1.33, 2.25)  | 90                 | 0.1332   |                     |                      |
| <i>Education level</i>       |           |                    |                    |          |                     |                      |
| Yes                          | 2         | 2.09 (1.14, 3.82)  | 91                 | 0.1733   | <0.0001             | 0.218                |
| No                           | 10        | 1.62 (1.35, 1.95)  | 82                 | 0.0596   |                     |                      |
| <i>Parity</i>                |           |                    |                    |          |                     |                      |
| Yes                          | 6         | 1.68 (1.25, 2.26)  | 95                 | 0.1239   |                     |                      |

|                                       |   |                   |    |        |         |       |
|---------------------------------------|---|-------------------|----|--------|---------|-------|
| No                                    | 6 | 1.68 (1.40, 2.02) | 41 | 0.0191 | <0.0001 | 0.809 |
| <b><i>Comorbidities</i></b>           |   |                   |    |        |         |       |
| Yes                                   | 5 | 1.70 (1.08, 2.67) | 96 | 0.2365 | <0.0001 | 0.482 |
| No                                    | 7 | 1.81 (1.58, 2.07) | 38 | 0.0109 |         |       |
| <b><i>Pregnancy complications</i></b> |   |                   |    |        |         |       |
| Yes                                   | 4 | 1.56 (1.12, 2.16) | 92 | 0.078  | <0.0001 | 0.715 |
| No                                    | 8 | 1.83 (1.36, 2.46) | 90 | 0.1388 |         |       |

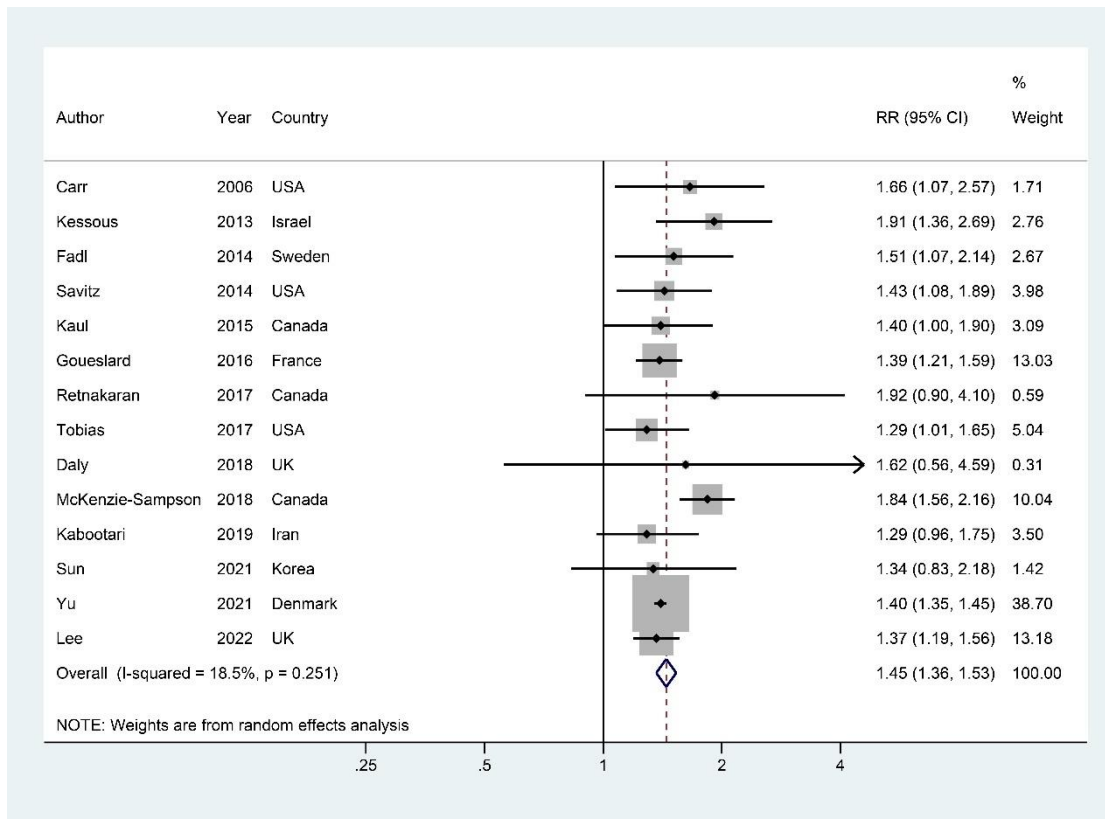

**Figure S1.** Forest plot of risk ratio of overall cardiovascular and cerebrovascular diseases in women with a history of gestational diabetes mellitus.

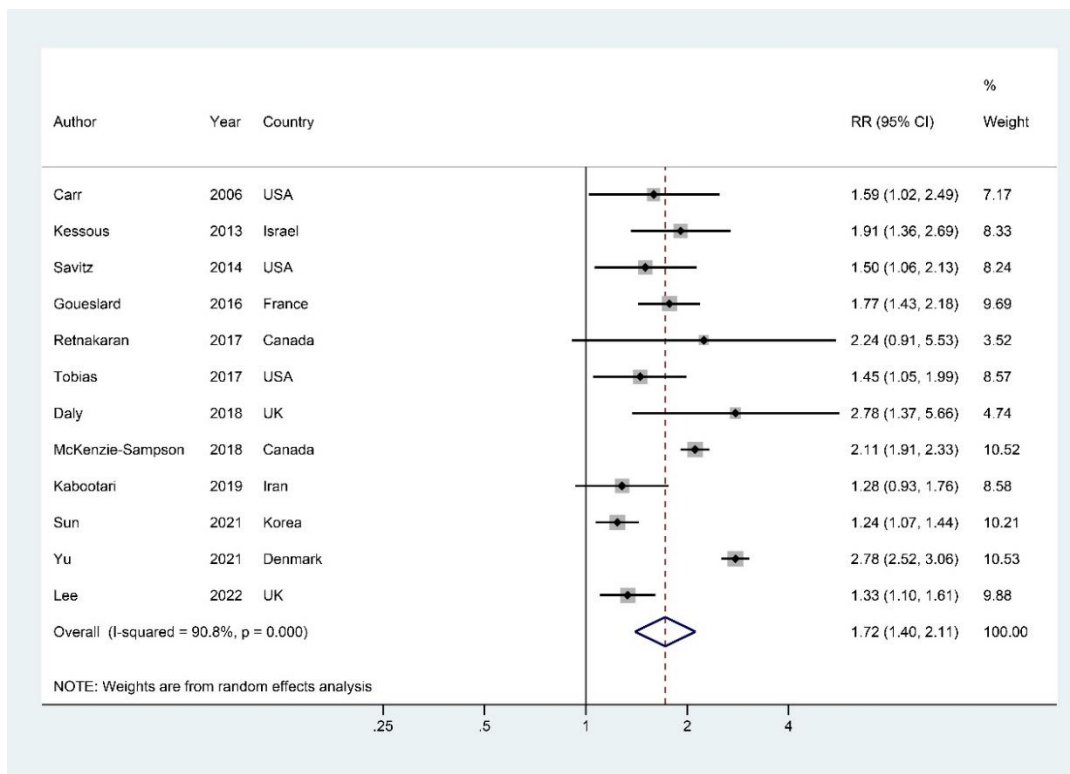

**Figure S2.** Forest plot of risk ratio of cardiovascular diseases in women with a history of gestational diabetes mellitus.

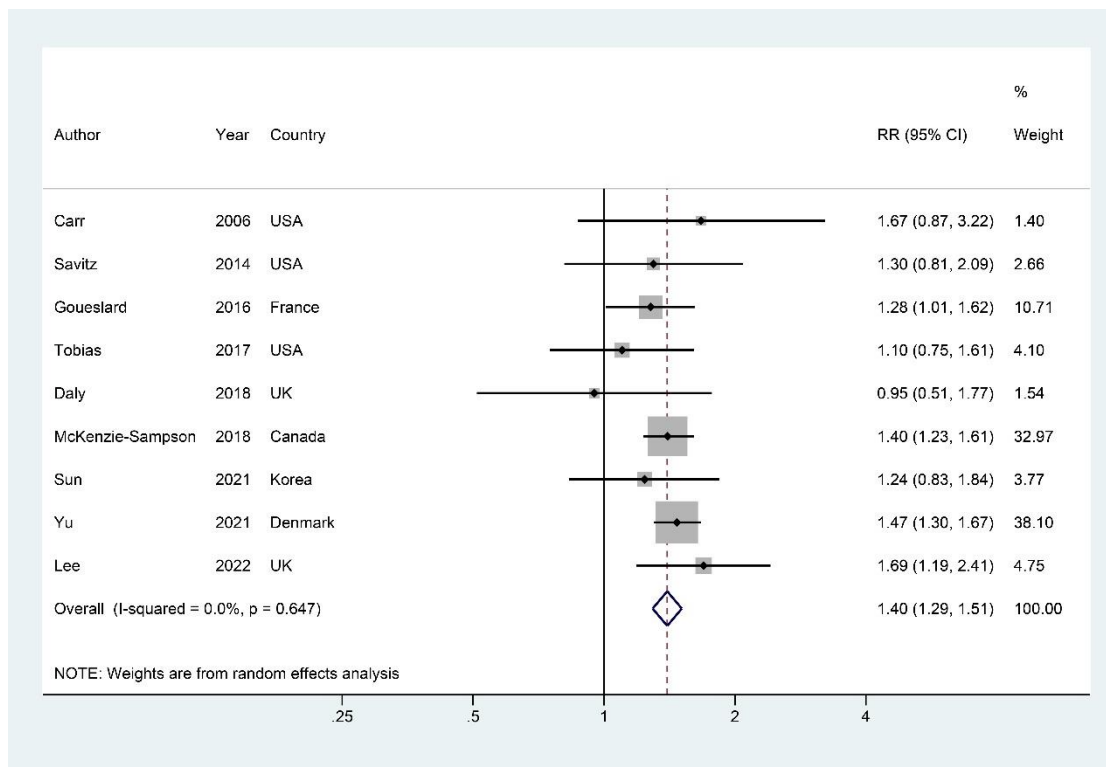

**Figure S3.** Forest plot of risk ratio of cerebrovascular diseases in women with a history of gestational diabetes mellitus.



A

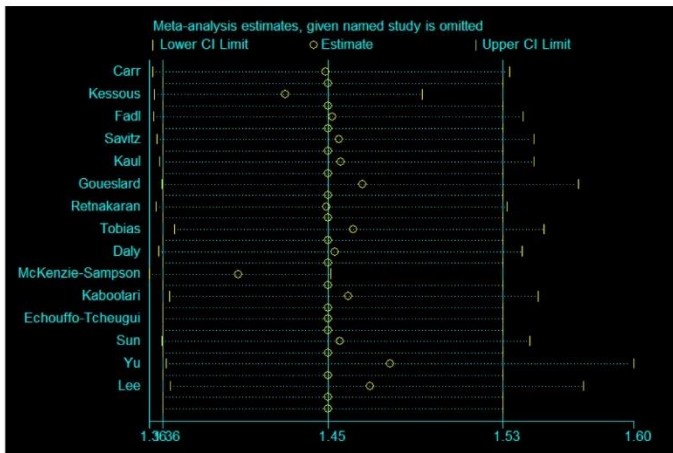

B

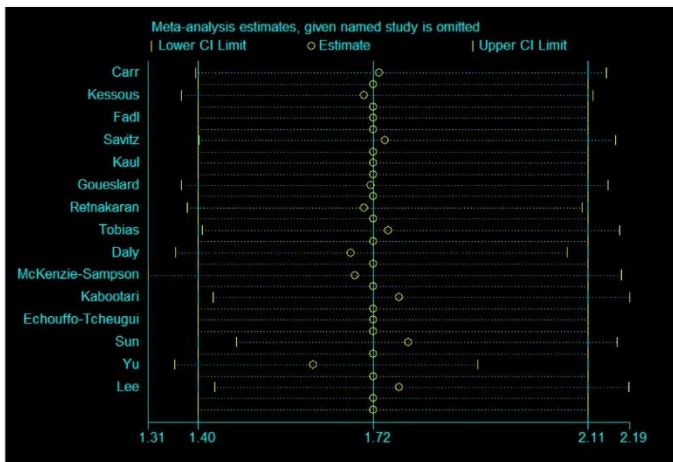

C

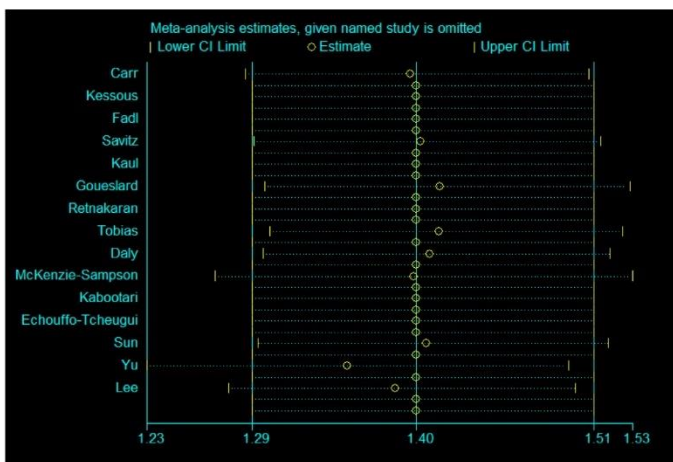

**Figure S4.** Sensitivity analysis using the jackknife approach, (A) overall cardiovascular and cerebrovascular diseases, (B) cardiovascular diseases, (C) cerebrovascular diseases.

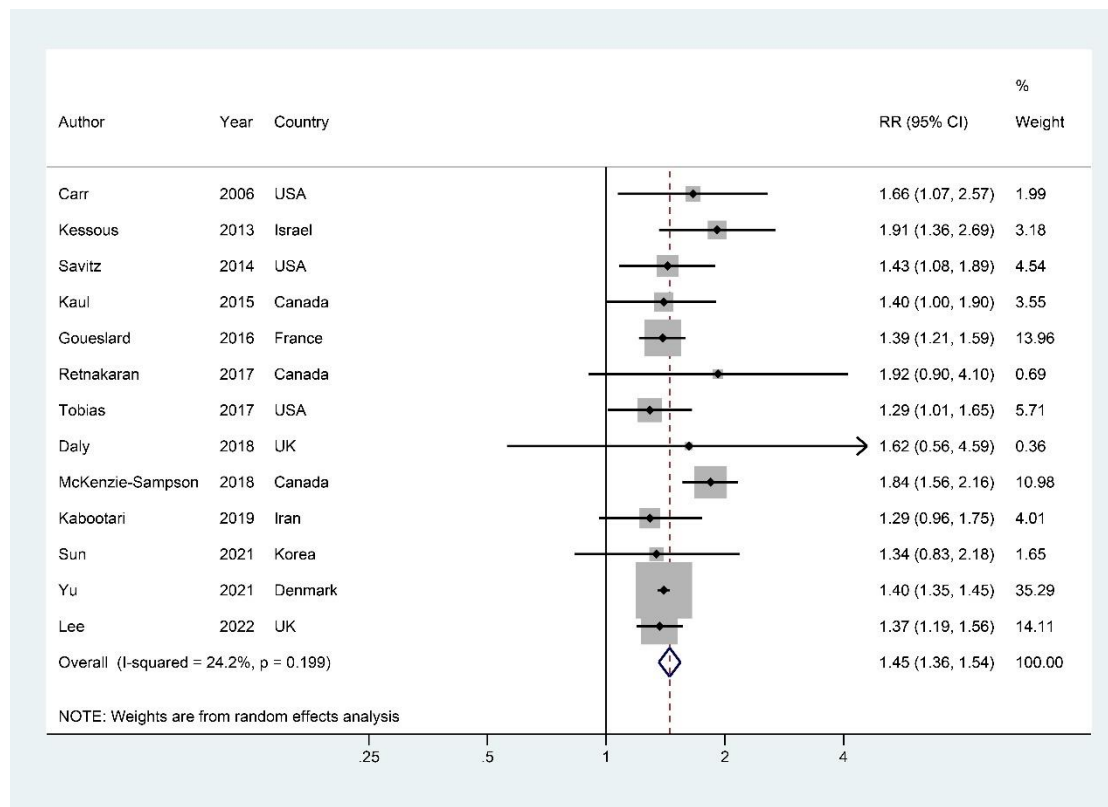

**Figure S5.** Sensitivity analysis after excluding the case-control study for the outcome of overall cardiovascular and cerebrovascular diseases.

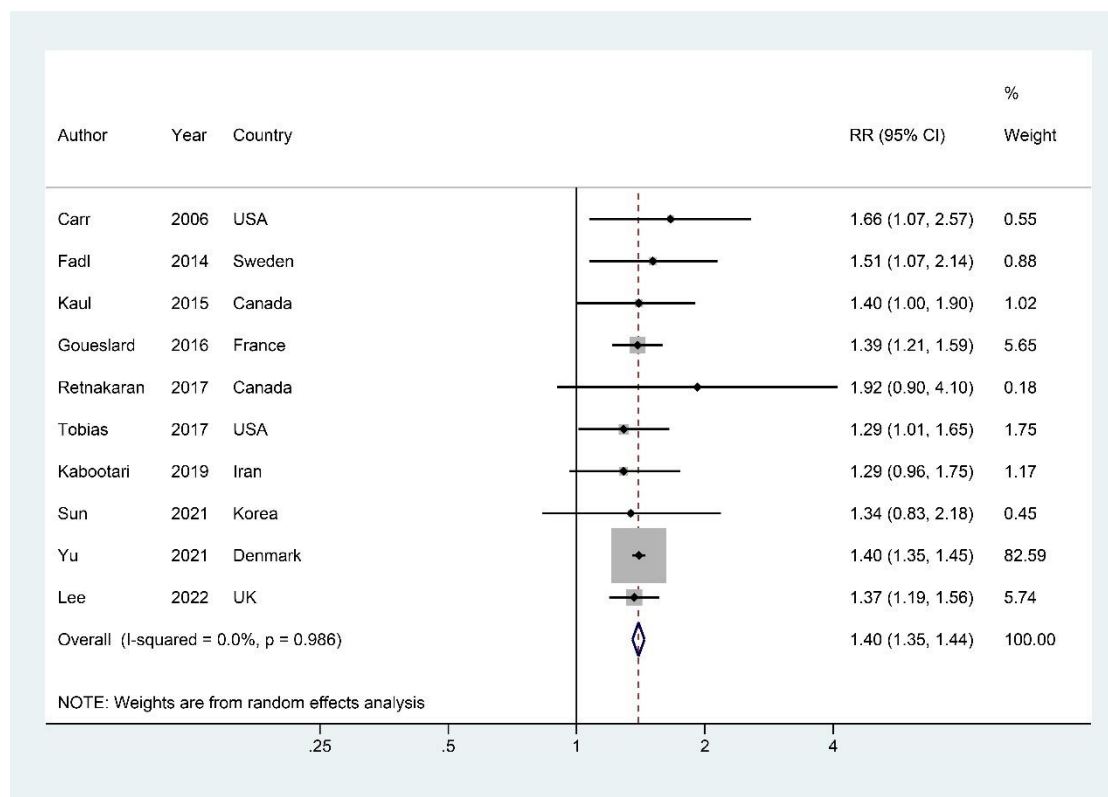

**Figure S6.** Sensitivity analysis after excluding the studies without direct information on the risk estimates for the outcome of overall cardiovascular and cerebrovascular diseases.

A

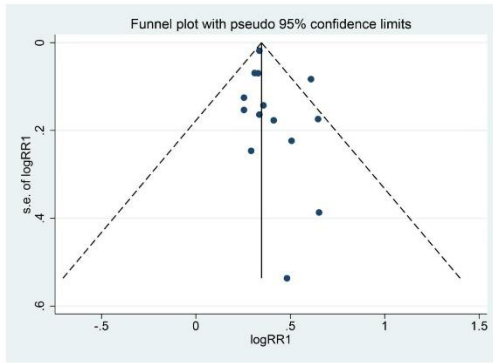

B

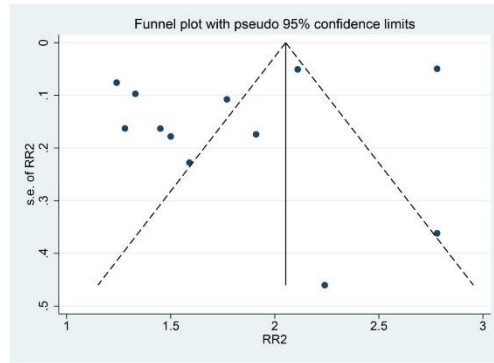

**Figure S7.** Funnel plot, (A) overall cardiovascular and cerebrovascular diseases, (B) cardiovascular diseases.

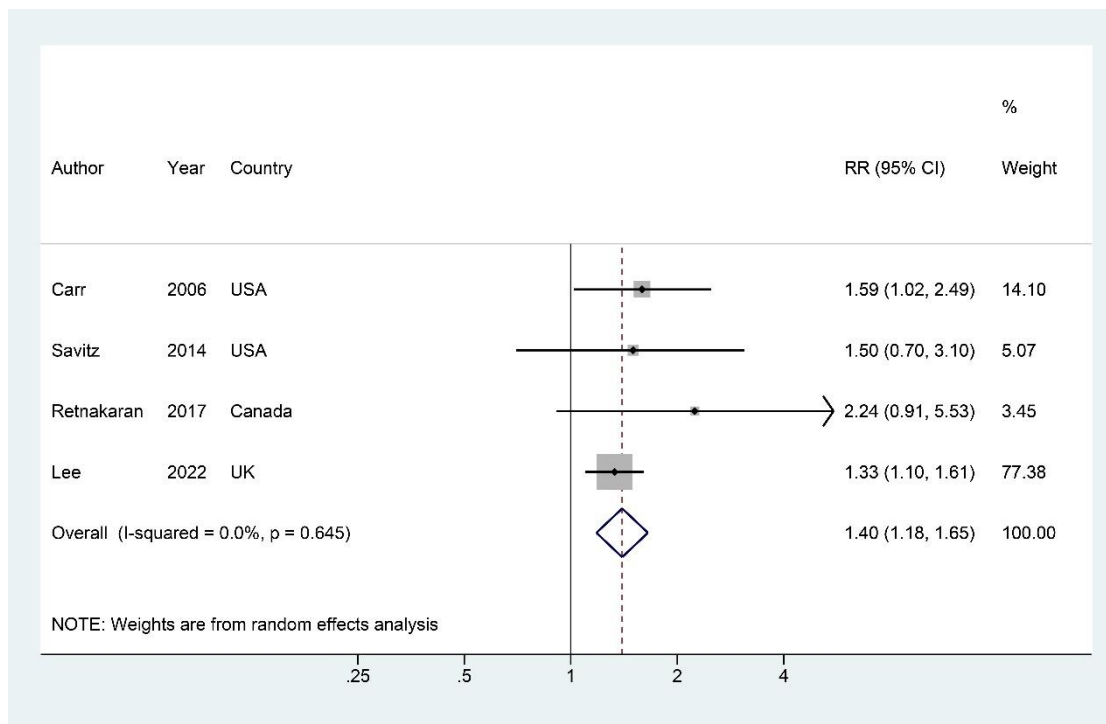

**Figure S8.** Forest plot of risk ratio of coronary artery diseases in women with a history of gestational diabetes mellitus.

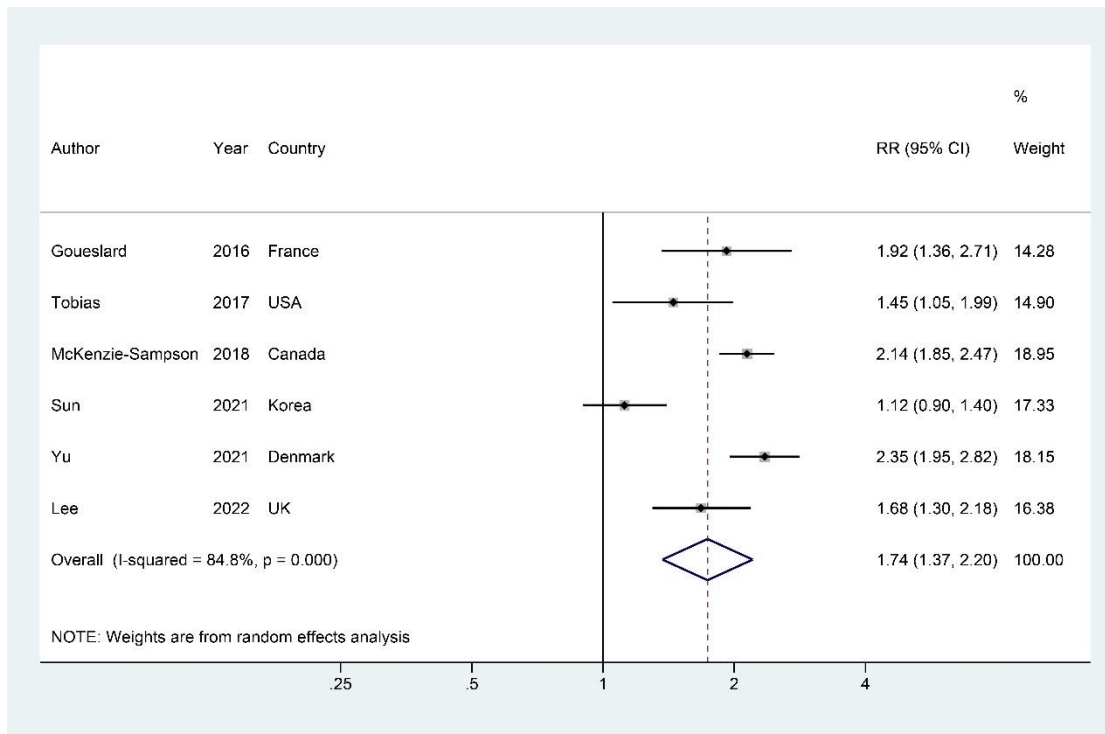

**Figure S9.** Forest plot of risk ratio of myocardial infarction in women with a history of gestational diabetes mellitus.

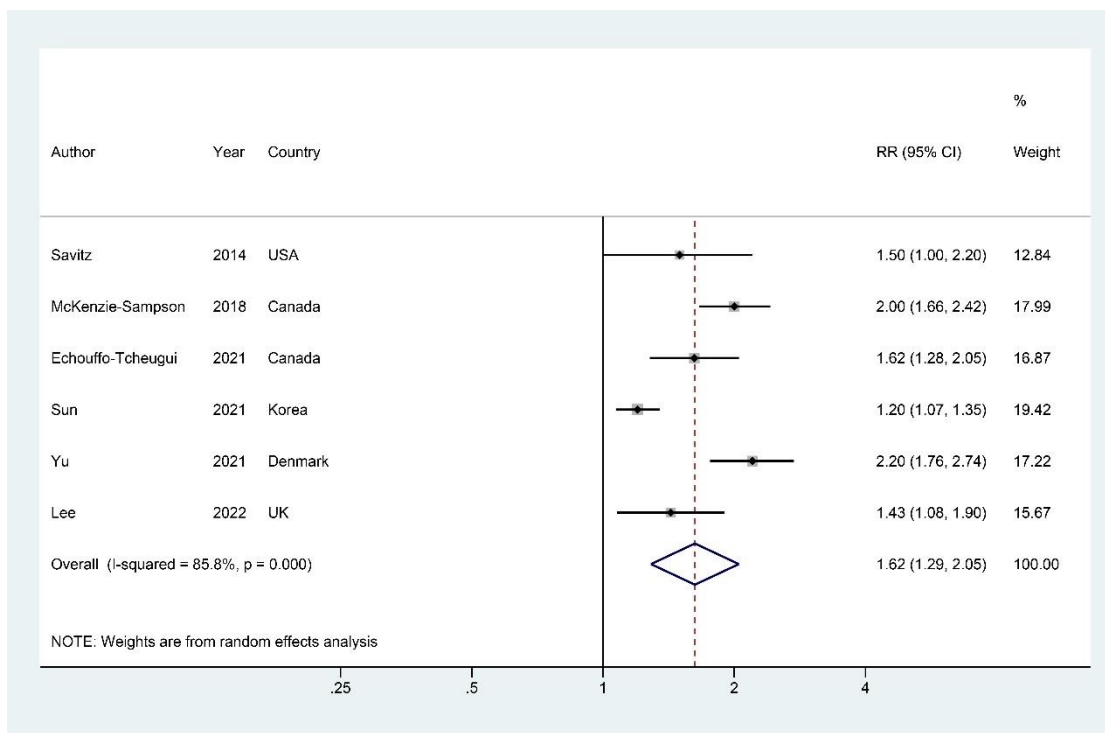

**Figure S10.** Forest plot of risk ratio of heart failure in women with a history of gestational diabetes mellitus.

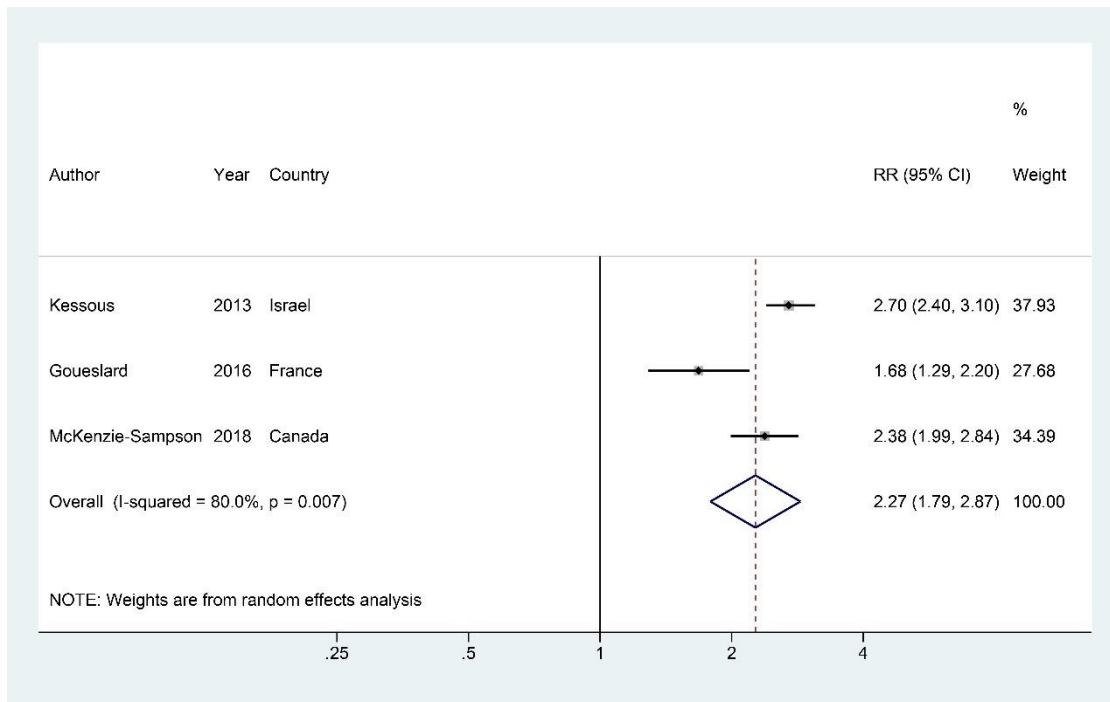

**Figure S11.** Forest plot of risk ratio of angina pectoris in women with a history of gestational diabetes mellitus.

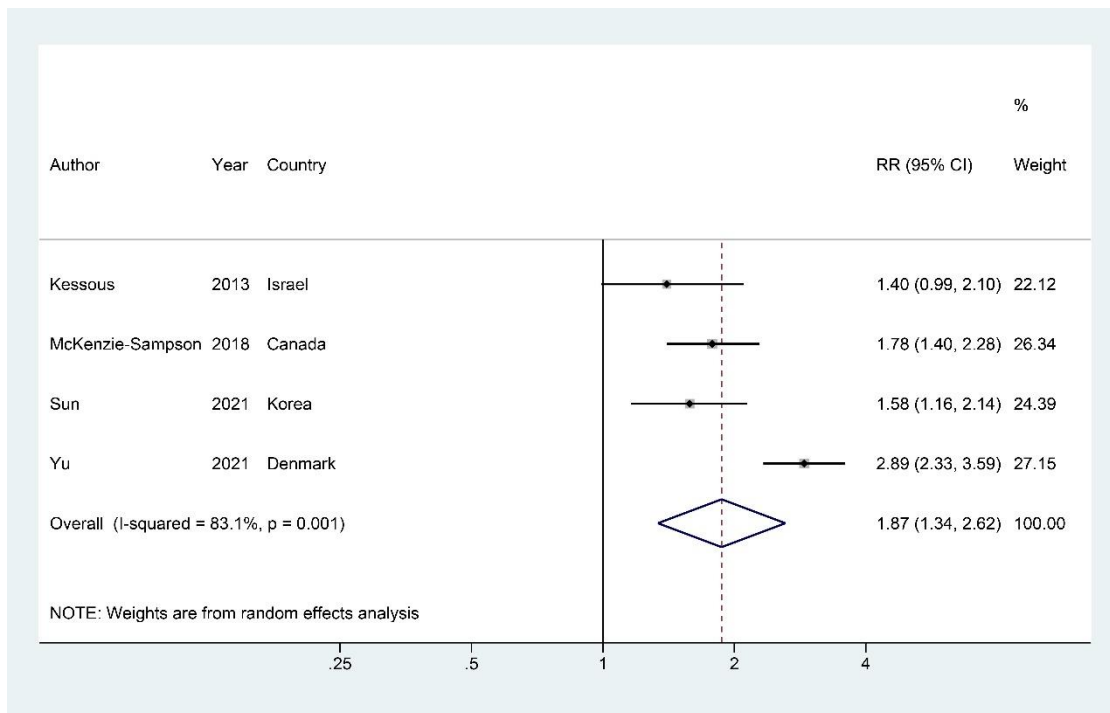

**Figure S12.** Forest plot of risk ratio of cardiovascular procedures in women with a history of gestational diabetes mellitus.

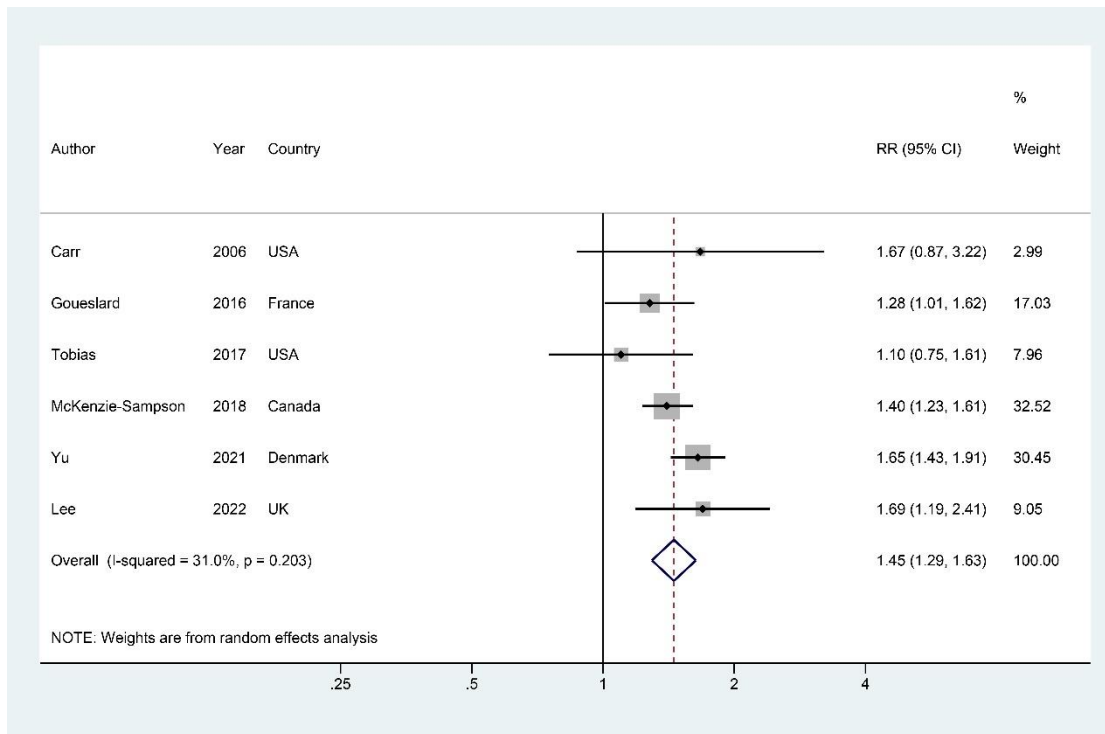

**Figure S13.** Forest plot of risk ratio of overall stroke in women with a history of gestational diabetes mellitus.

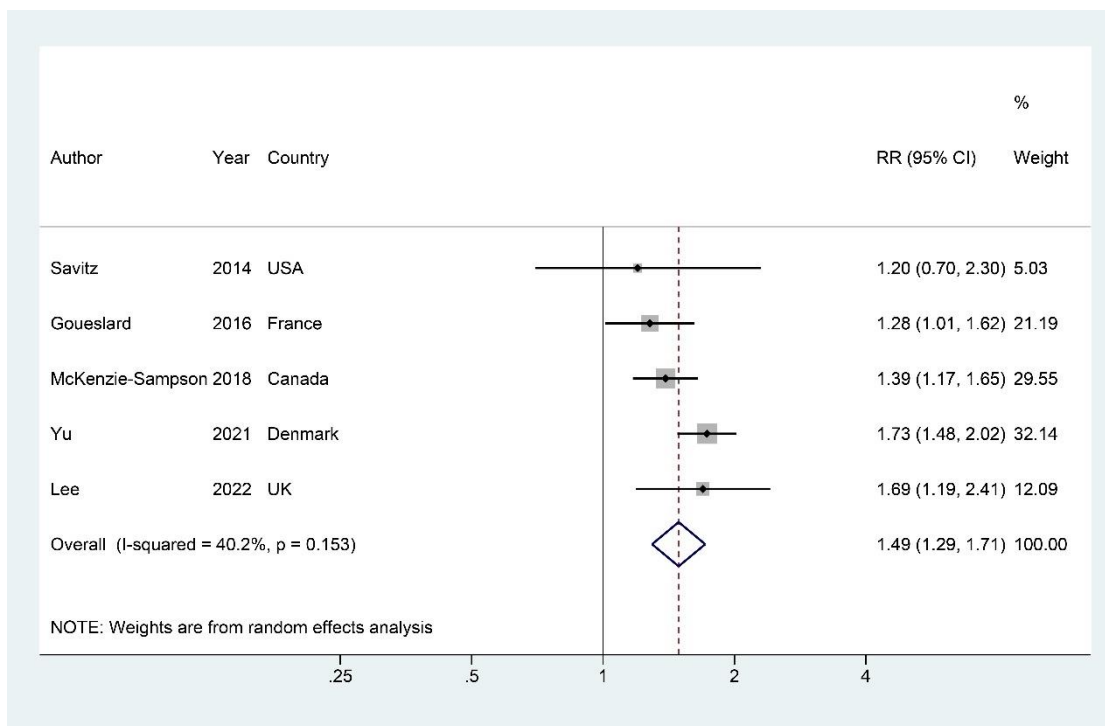

**Figure S14.** Forest plot of risk ratio of ischemic stroke in women with a history of gestational diabetes mellitus.

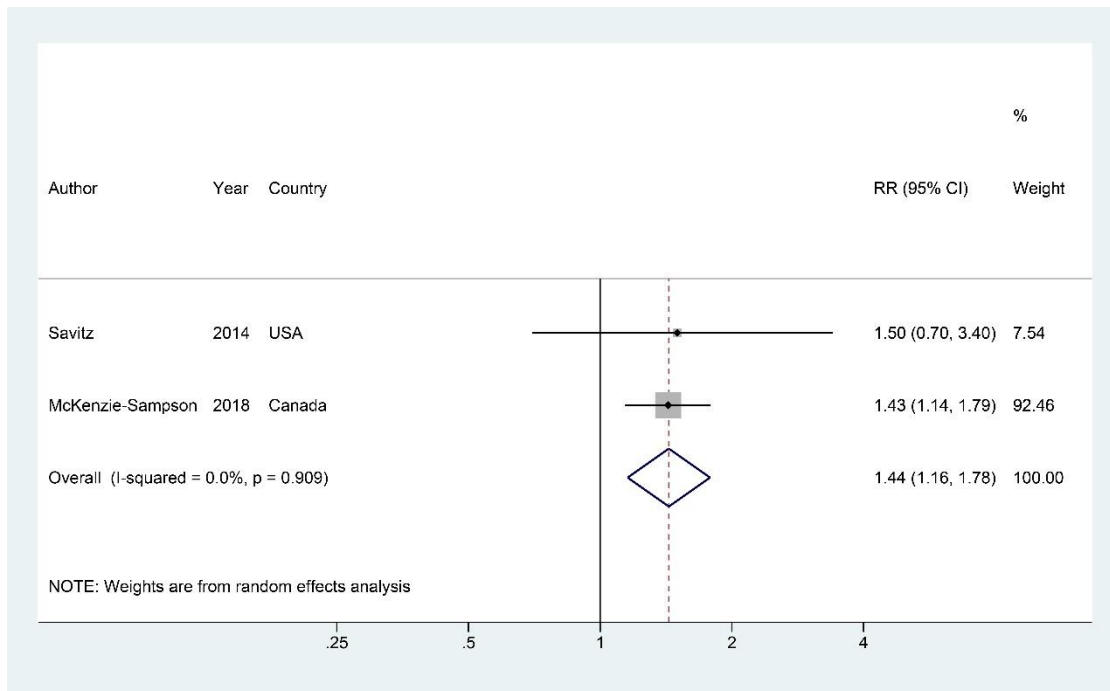

**Figure S15.** Forest plot of risk ratio of hemorrhagic stroke in women with a history of gestational diabetes mellitus.

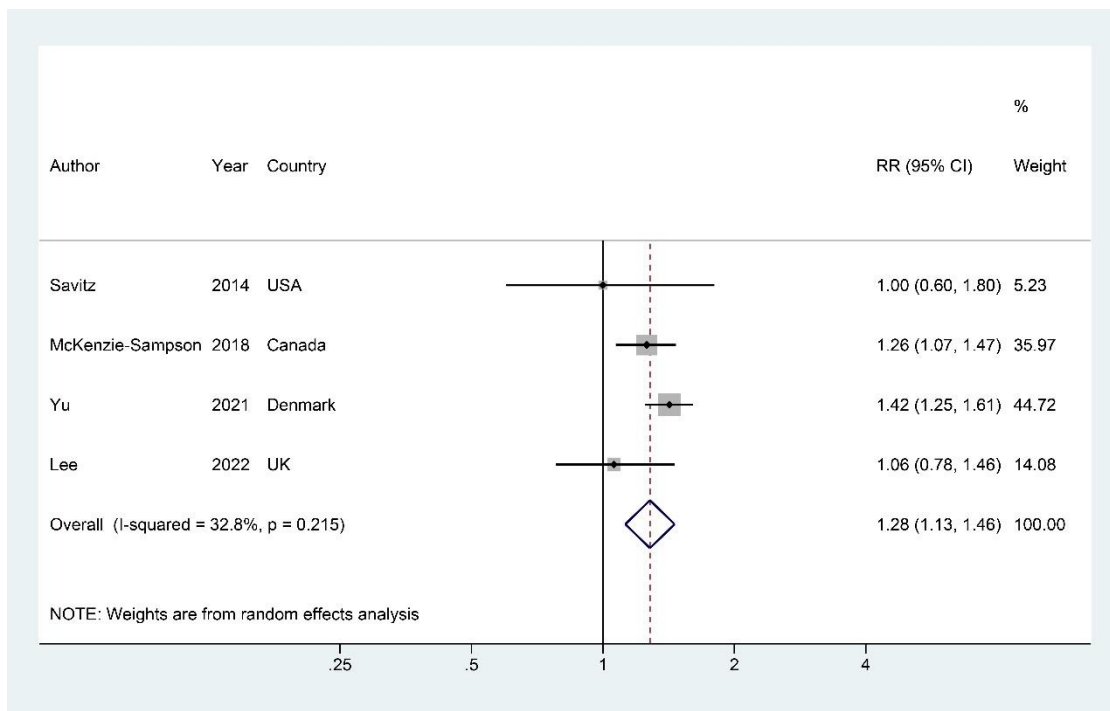

**Figure S16.** Forest plot of risk ratio of venous thromboembolism in women with a history of gestational diabetes mellitus.

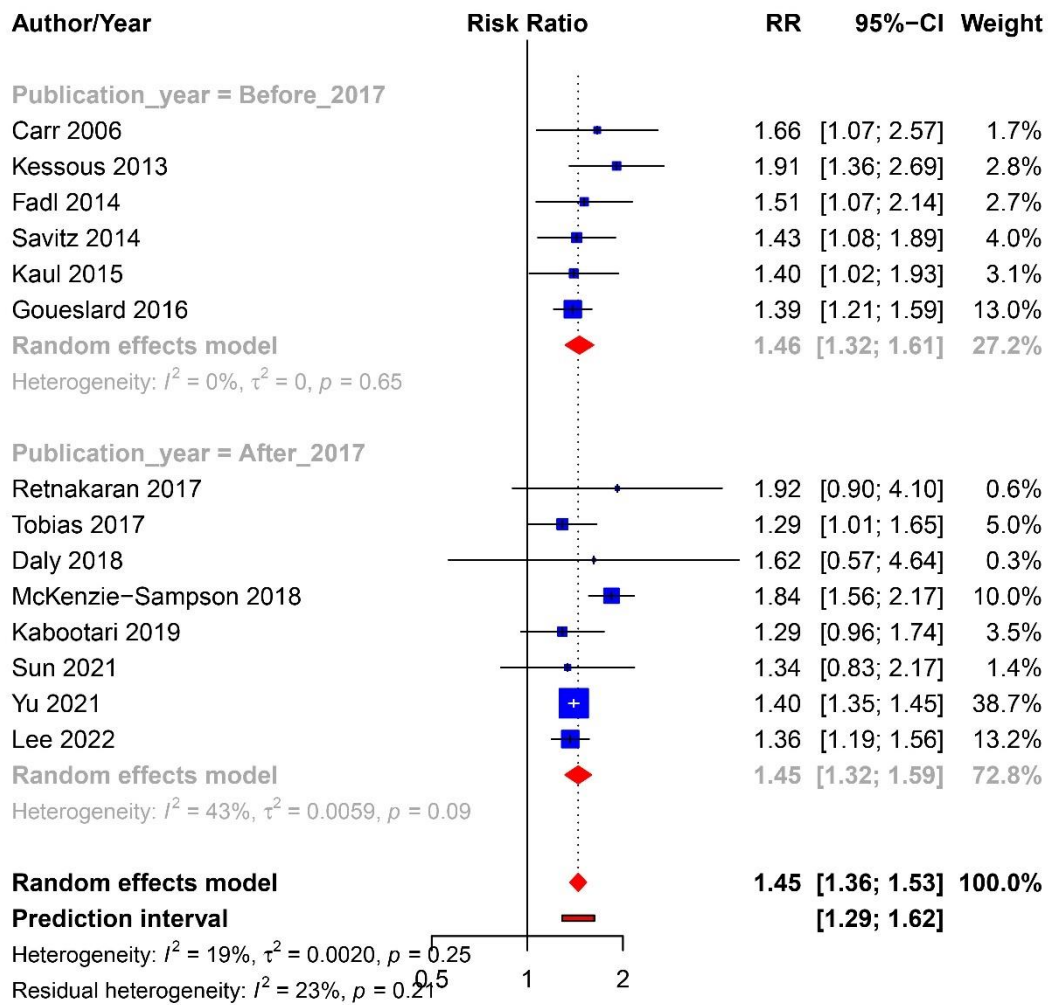

**Figure S17.** Subgroup analyses of the association between gestational diabetes mellitus and overall cardiovascular and cerebrovascular diseases, according to year of publication.



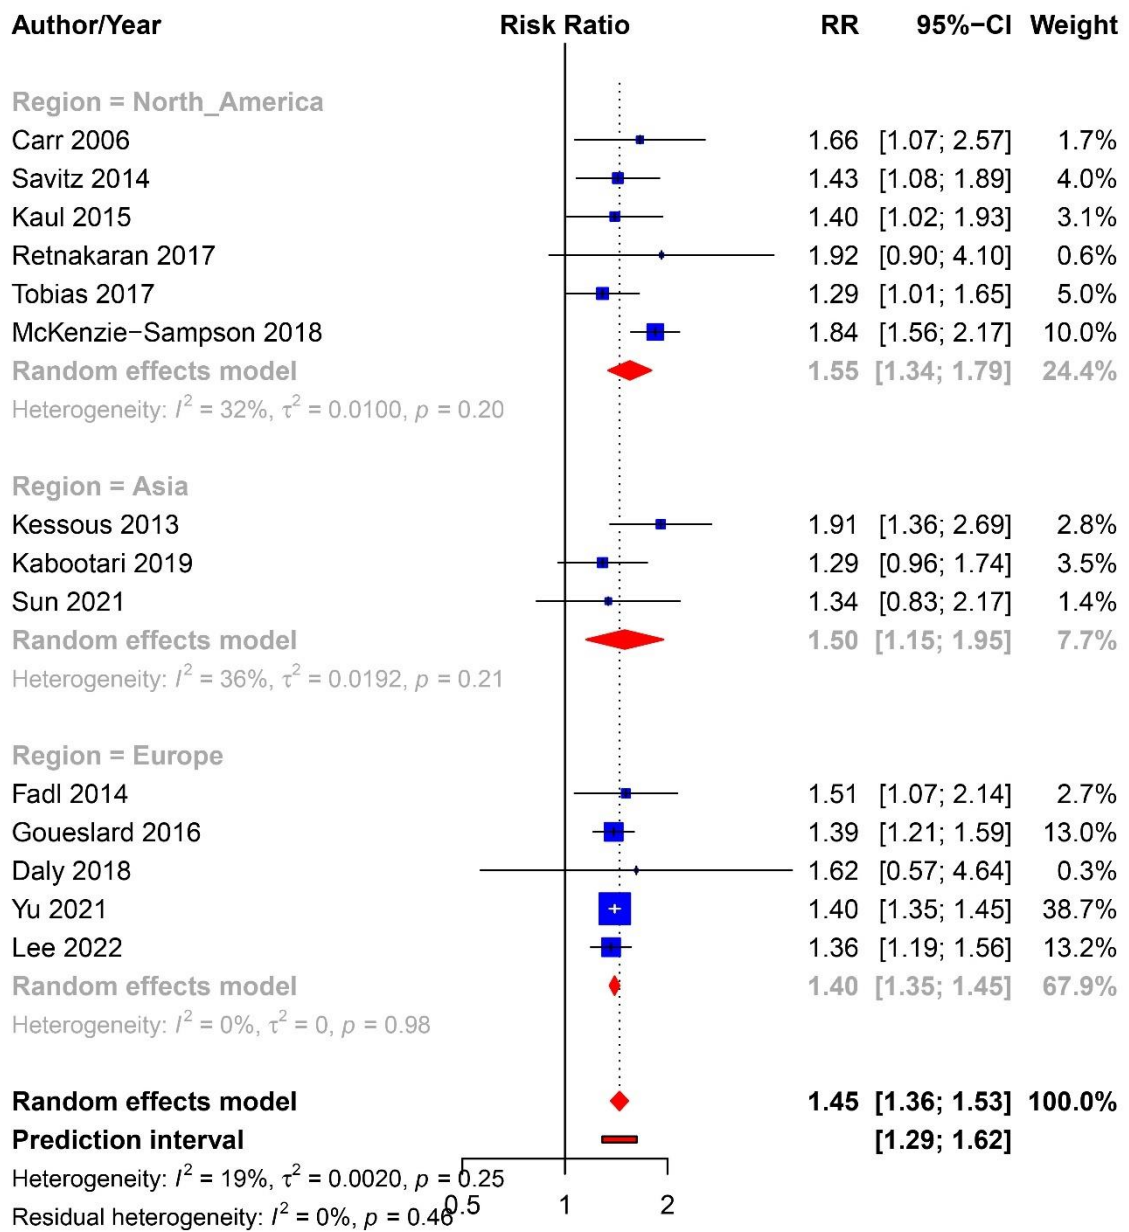

**Figure S18.** Subgroup analyses of the association between gestational diabetes mellitus and overall cardiovascular and cerebrovascular diseases, according to study location.

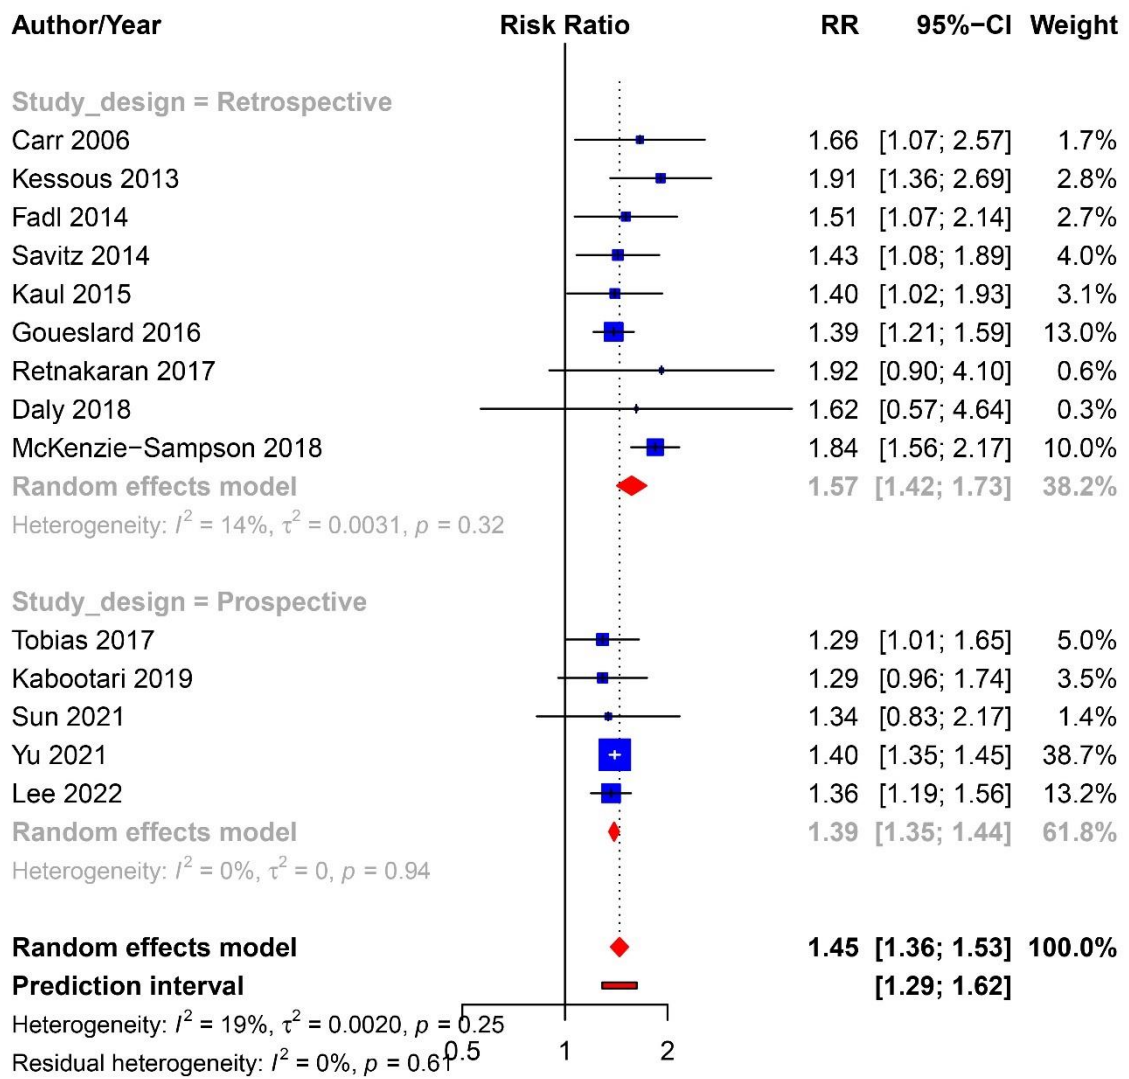

**Figure S19.** Subgroup analyses of the association between gestational diabetes mellitus and overall cardiovascular and cerebrovascular diseases, according to study design.

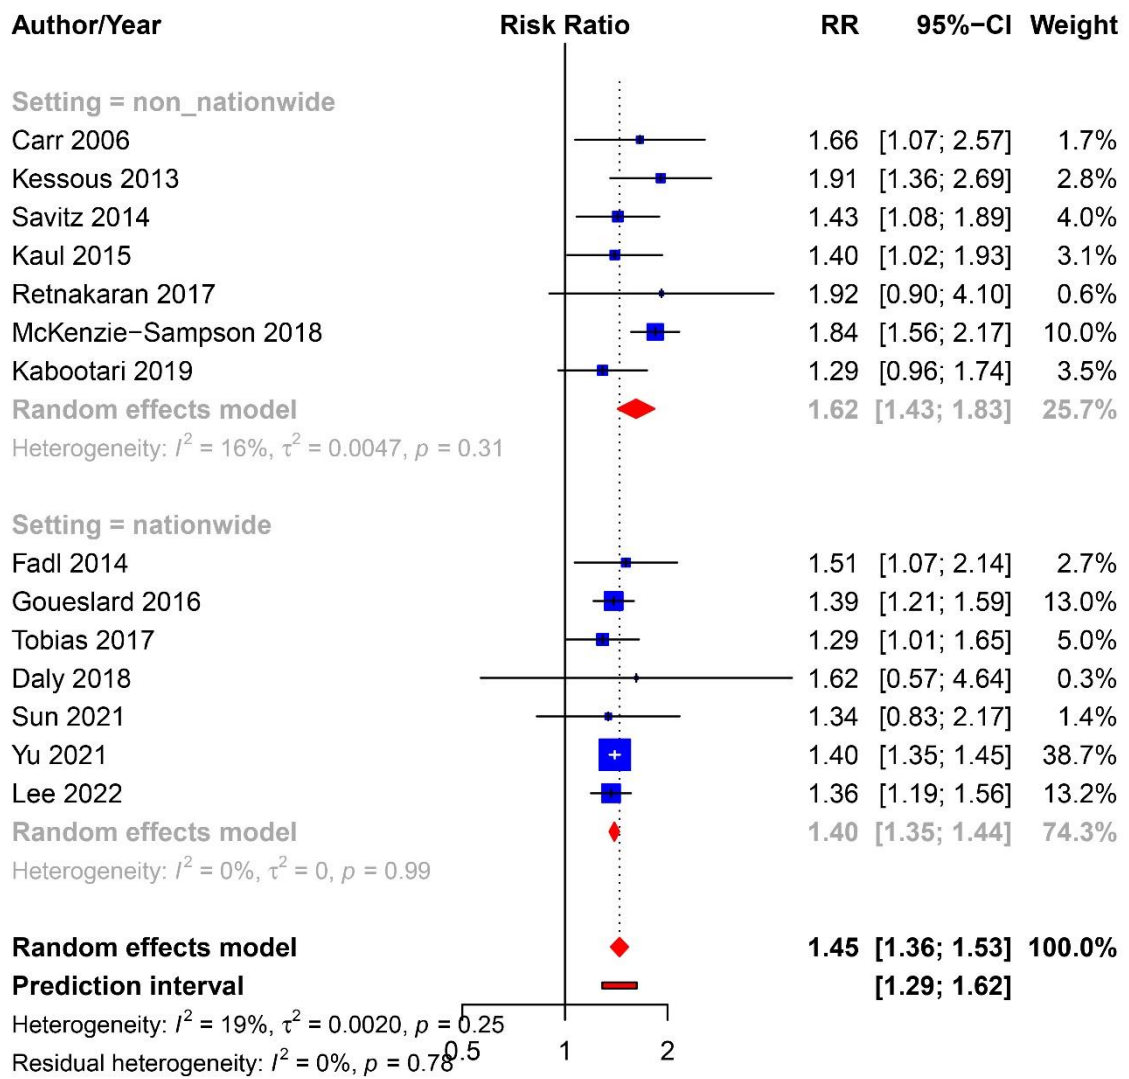

**Figure S20.** Subgroup analyses of the association between gestational diabetes mellitus and overall cardiovascular and cerebrovascular diseases, according to source of data.

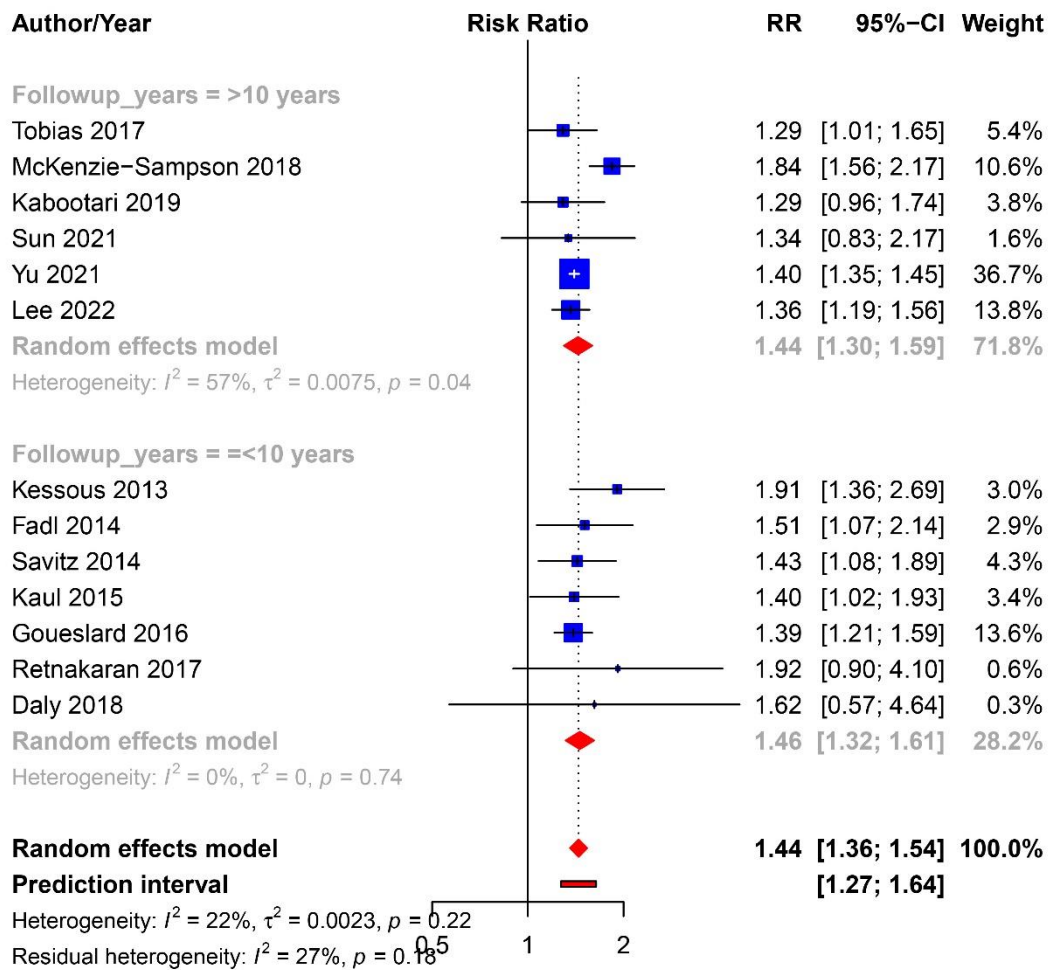

**Figure S21.** Subgroup analyses of the association between gestational diabetes mellitus and overall cardiovascular and cerebrovascular diseases, according to follow-up duration.

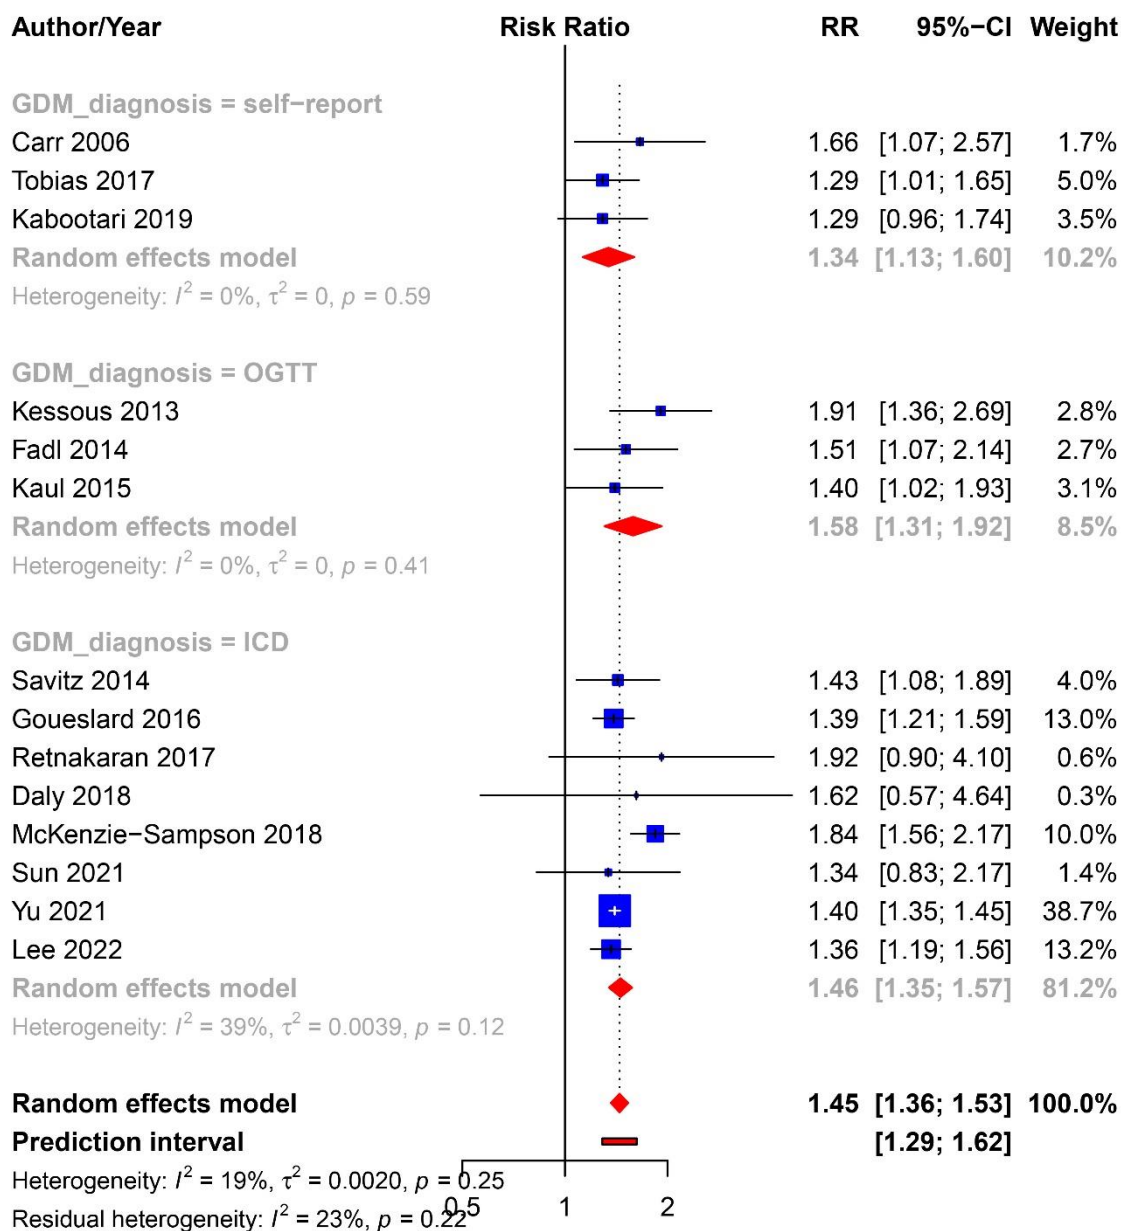

**Figure S22.** Subgroup analyses of the association between gestational diabetes mellitus and overall cardiovascular and cerebrovascular diseases, according to method of ascertainment of gestational diabetes mellitus.

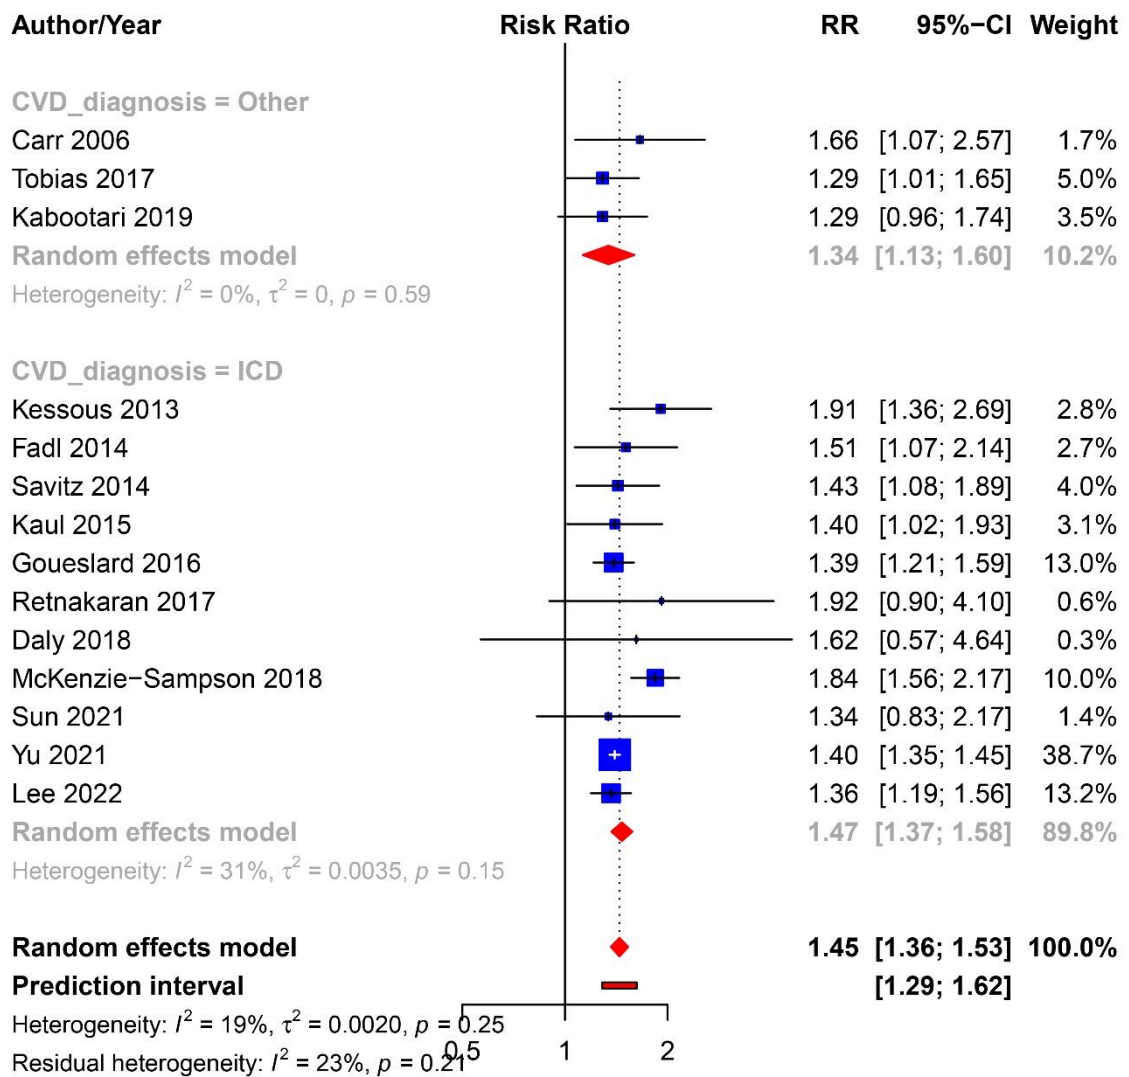

**Figure S23.** Subgroup analyses of the association between gestational diabetes mellitus and overall cardiovascular and cerebrovascular diseases, according to method of ascertainment of cardiovascular and cerebrovascular diseases.

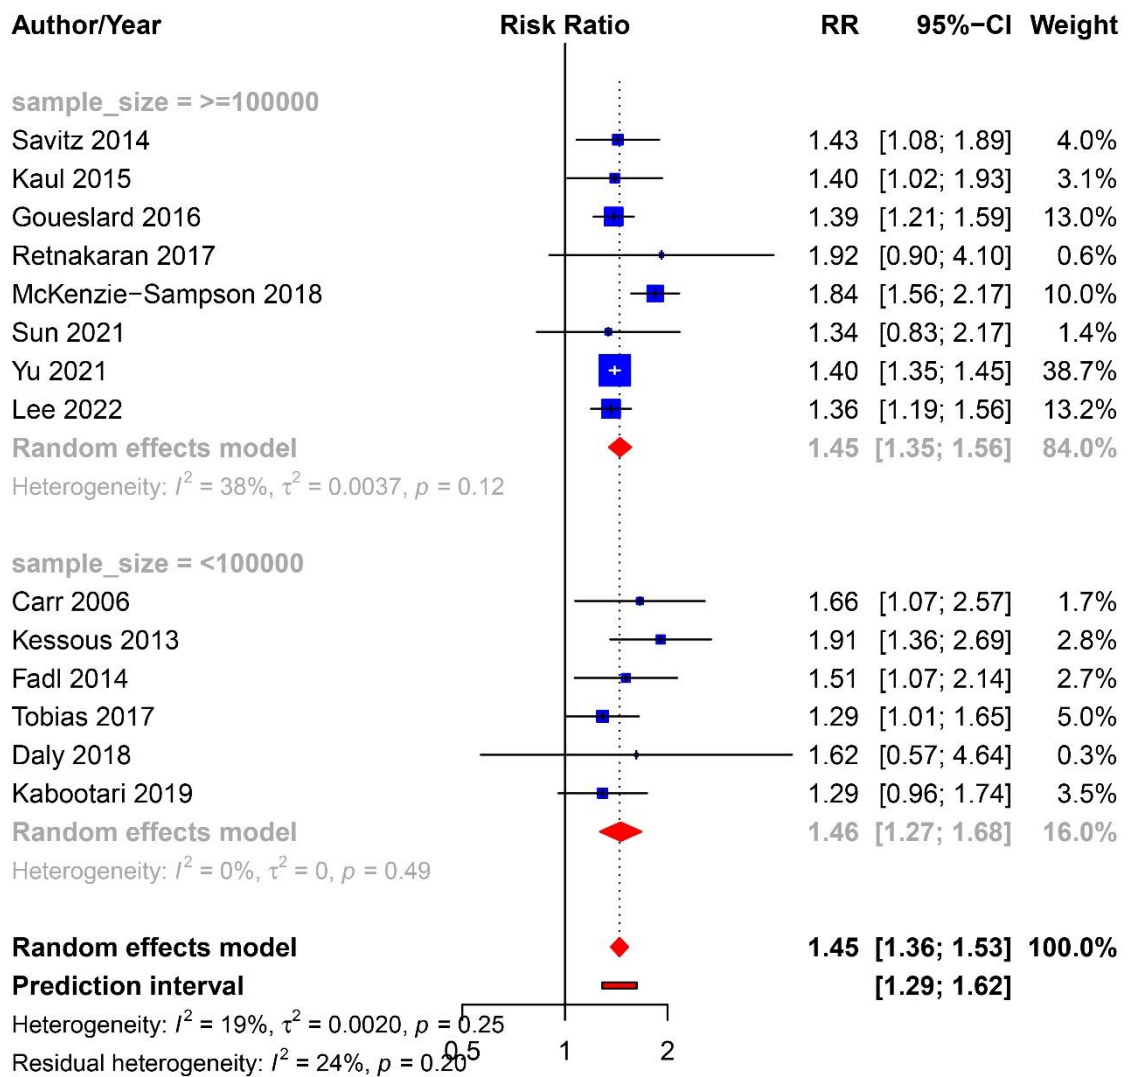

**Figure S24.** Subgroup analyses of the association between gestational diabetes mellitus and overall cardiovascular and cerebrovascular diseases, according to sample size.

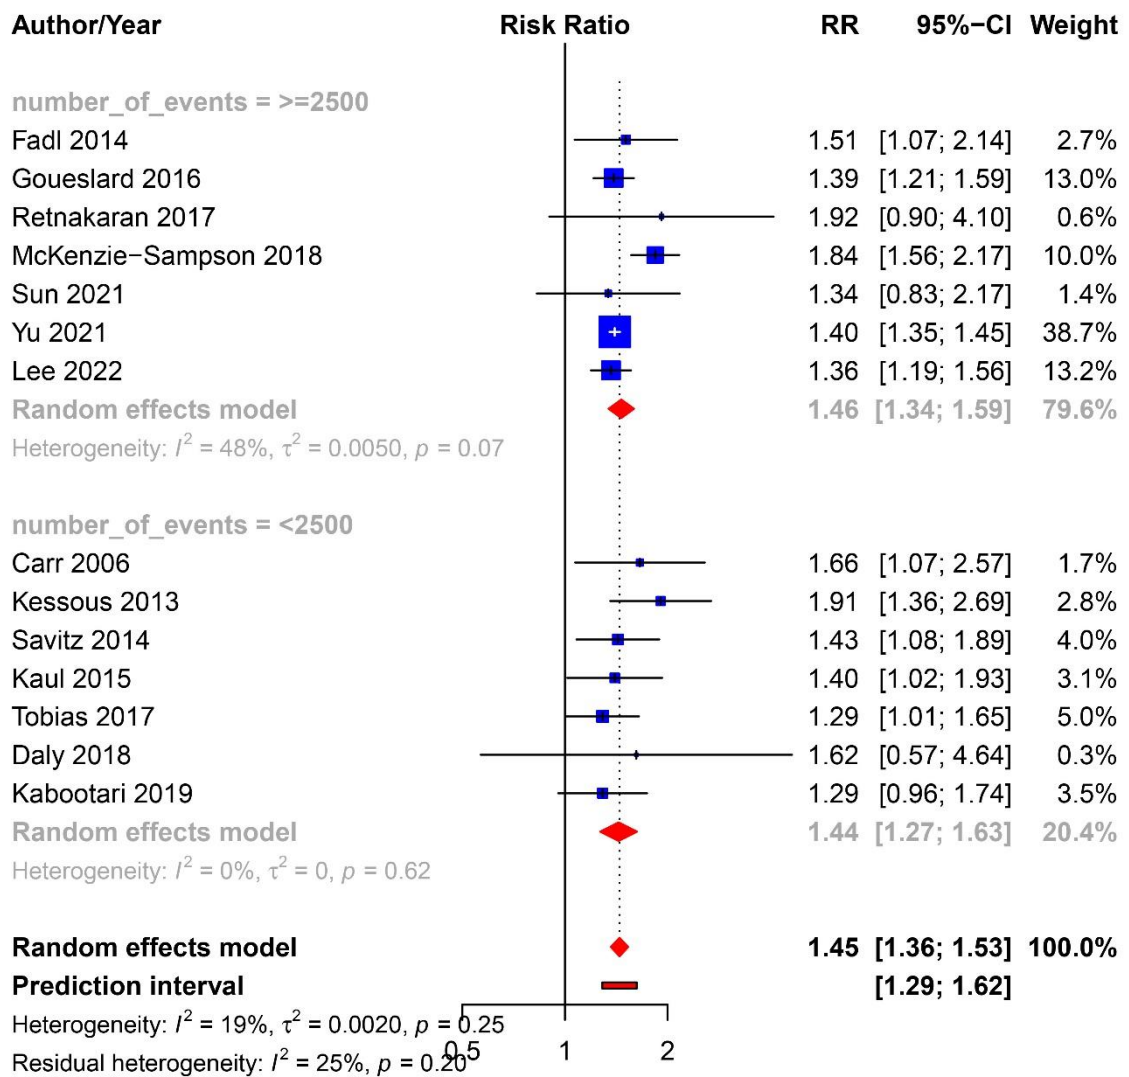

**Figure S25.** Subgroup analyses of the association between gestational diabetes mellitus and overall cardiovascular and cerebrovascular diseases, according to number of events.





**Figure S26.** Subgroup analyses of the association between gestational diabetes mellitus and overall cardiovascular and cerebrovascular diseases, according to risk-of-bias (ROBINS-I).

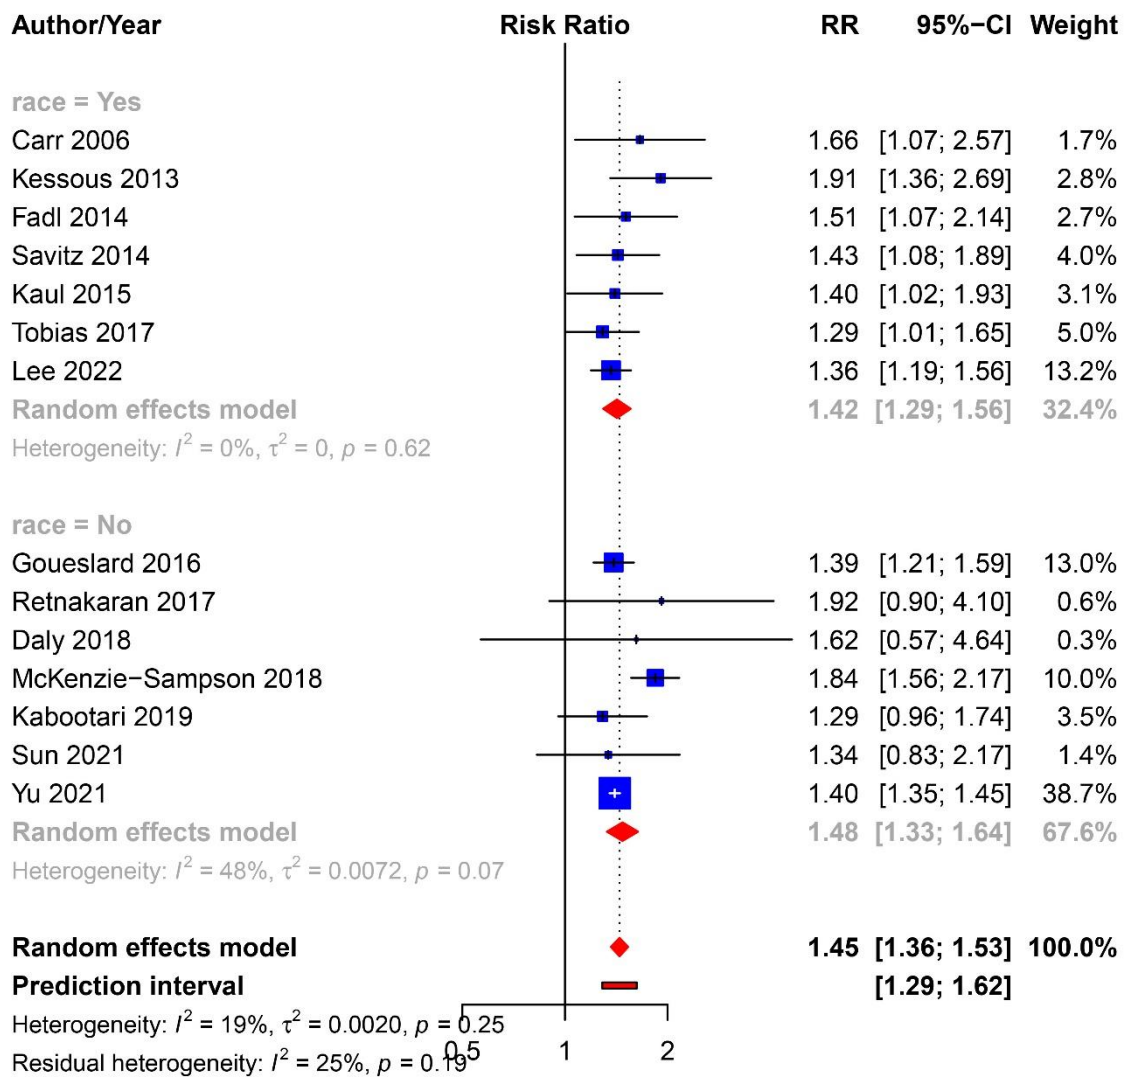

**Figure S27.** Subgroup analyses of the association between gestational diabetes mellitus and overall cardiovascular and cerebrovascular diseases, according to adjustment of race.

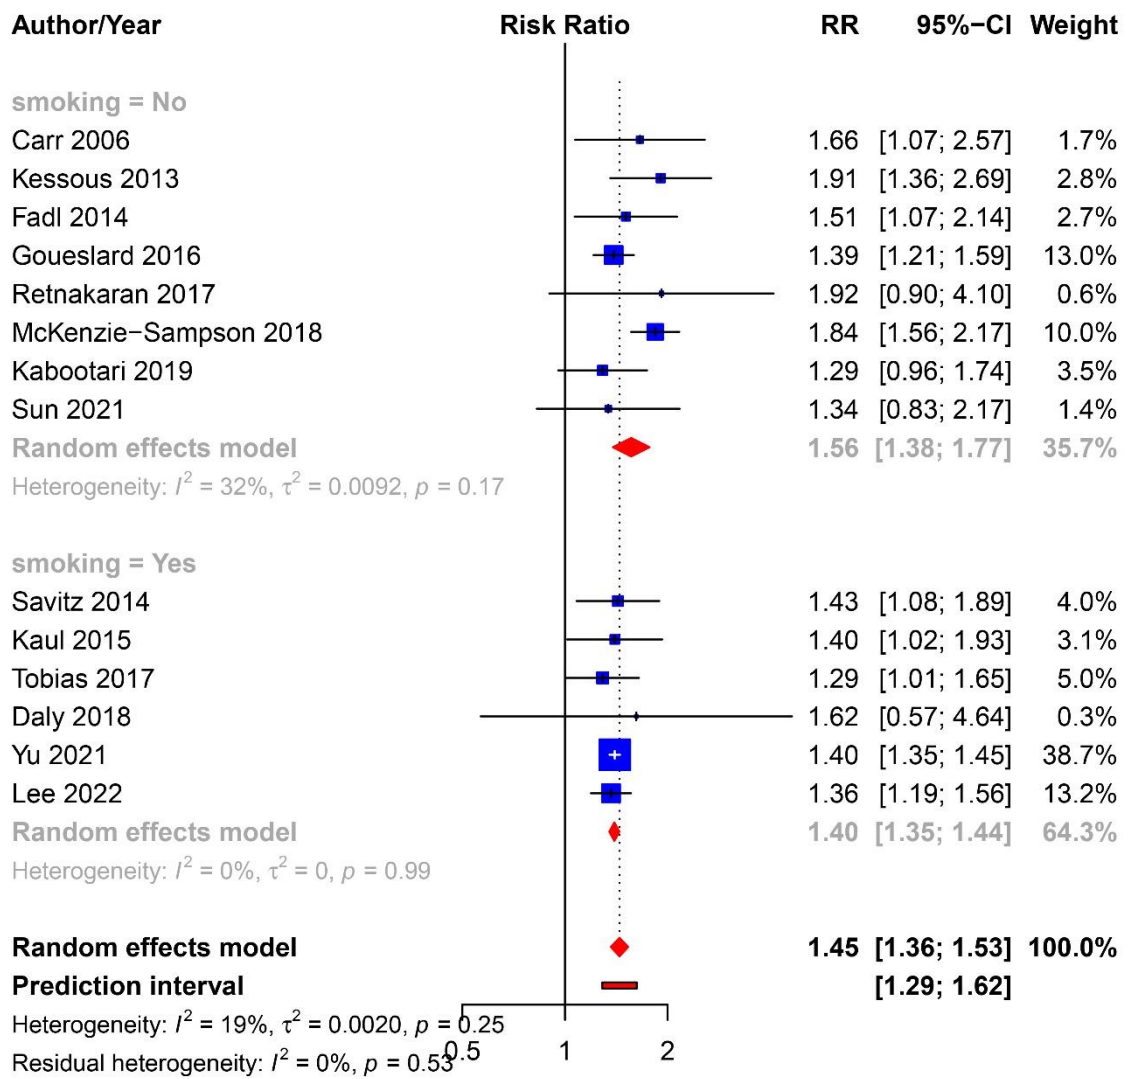

**Figure S28.** Subgroup analyses of the association between gestational diabetes mellitus and overall cardiovascular and cerebrovascular diseases, according to adjustment of smoking.

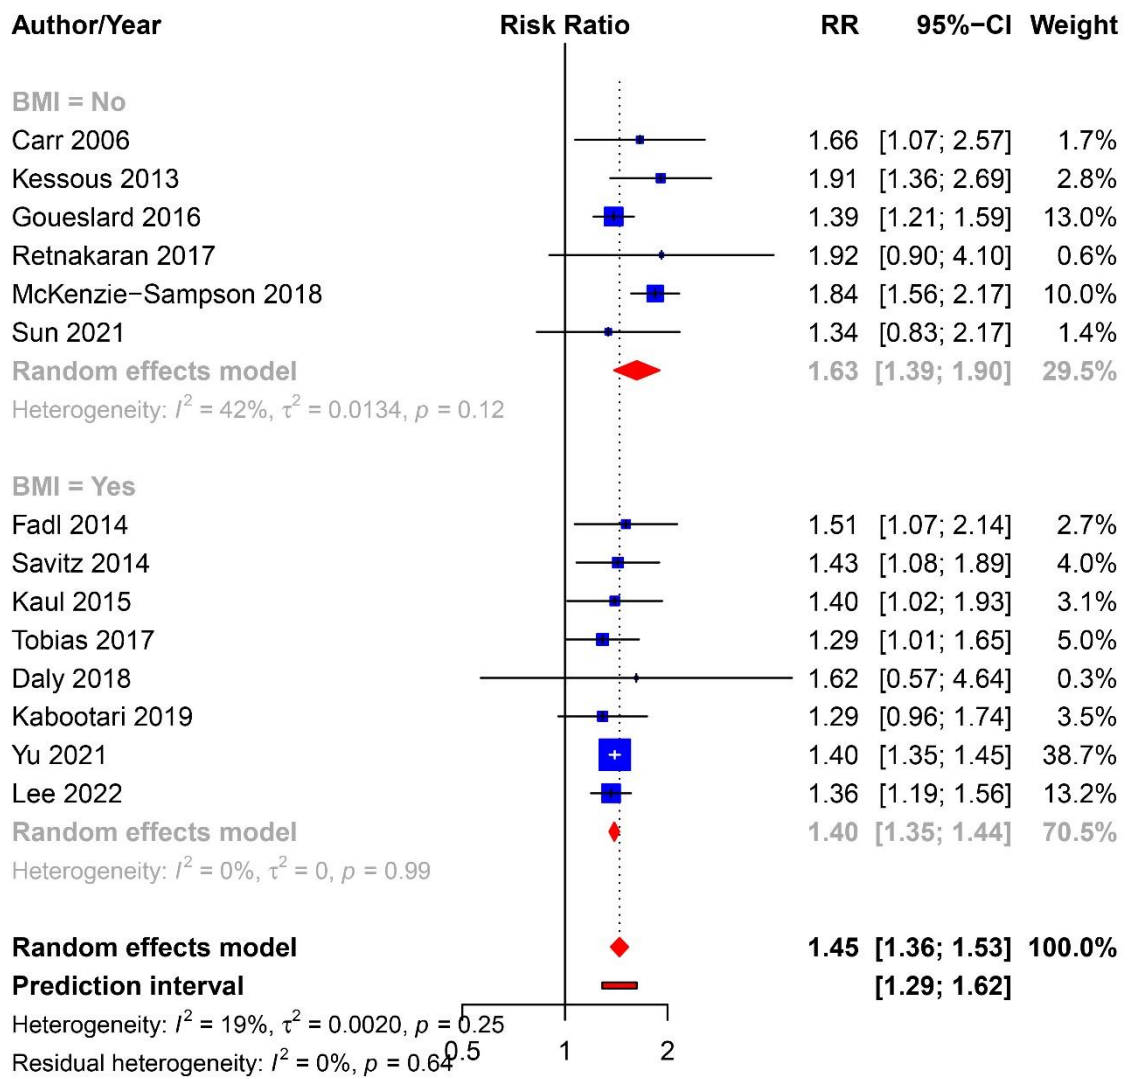

**Figure S29.** Subgroup analyses of the association between gestational diabetes mellitus and overall cardiovascular and cerebrovascular diseases, according to adjustment of body mass index.

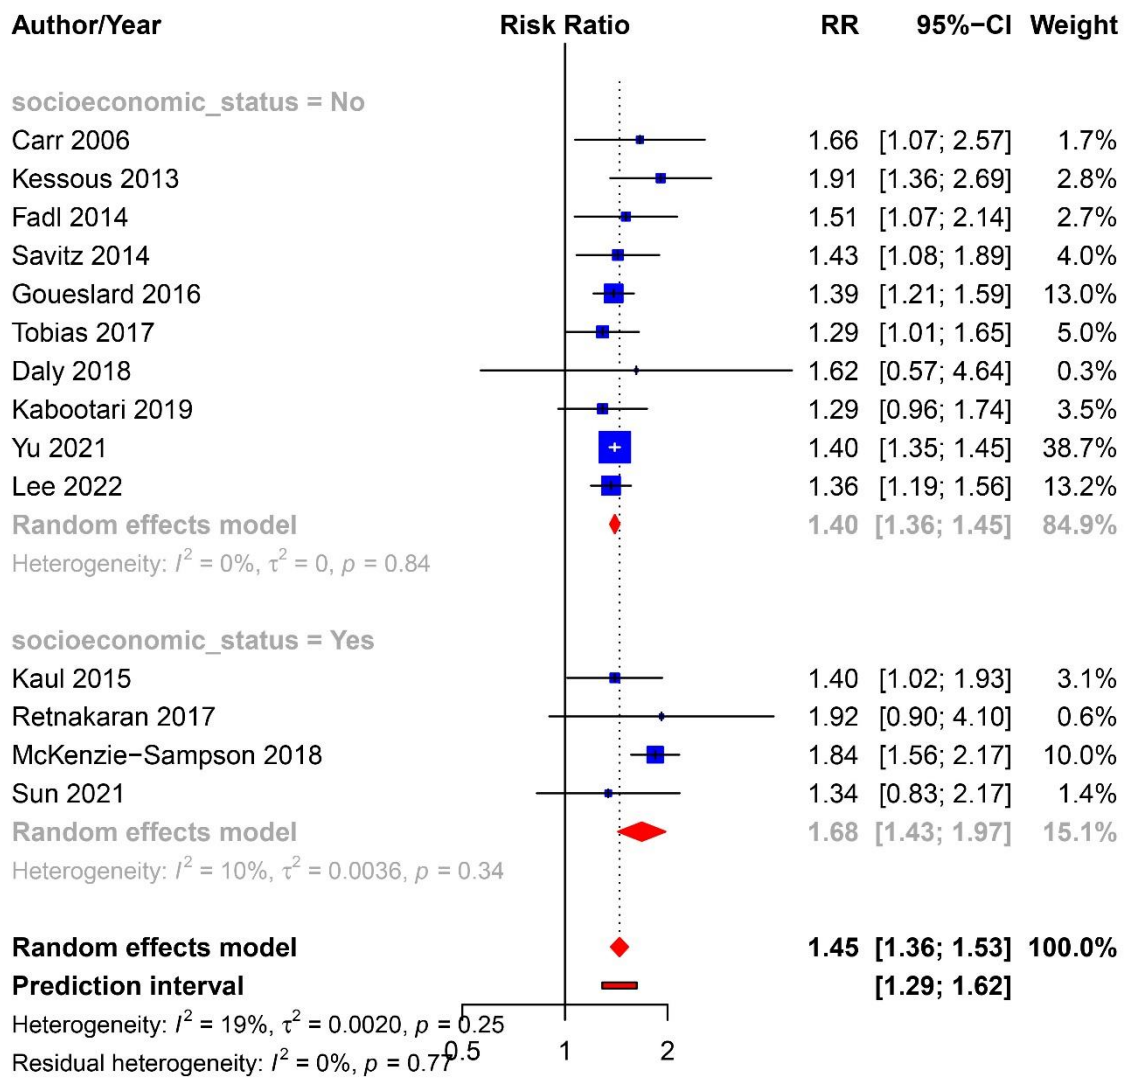

**Figure S30.** Subgroup analyses of the association between gestational diabetes mellitus and overall cardiovascular and cerebrovascular diseases, according to adjustment of socio-economic status.

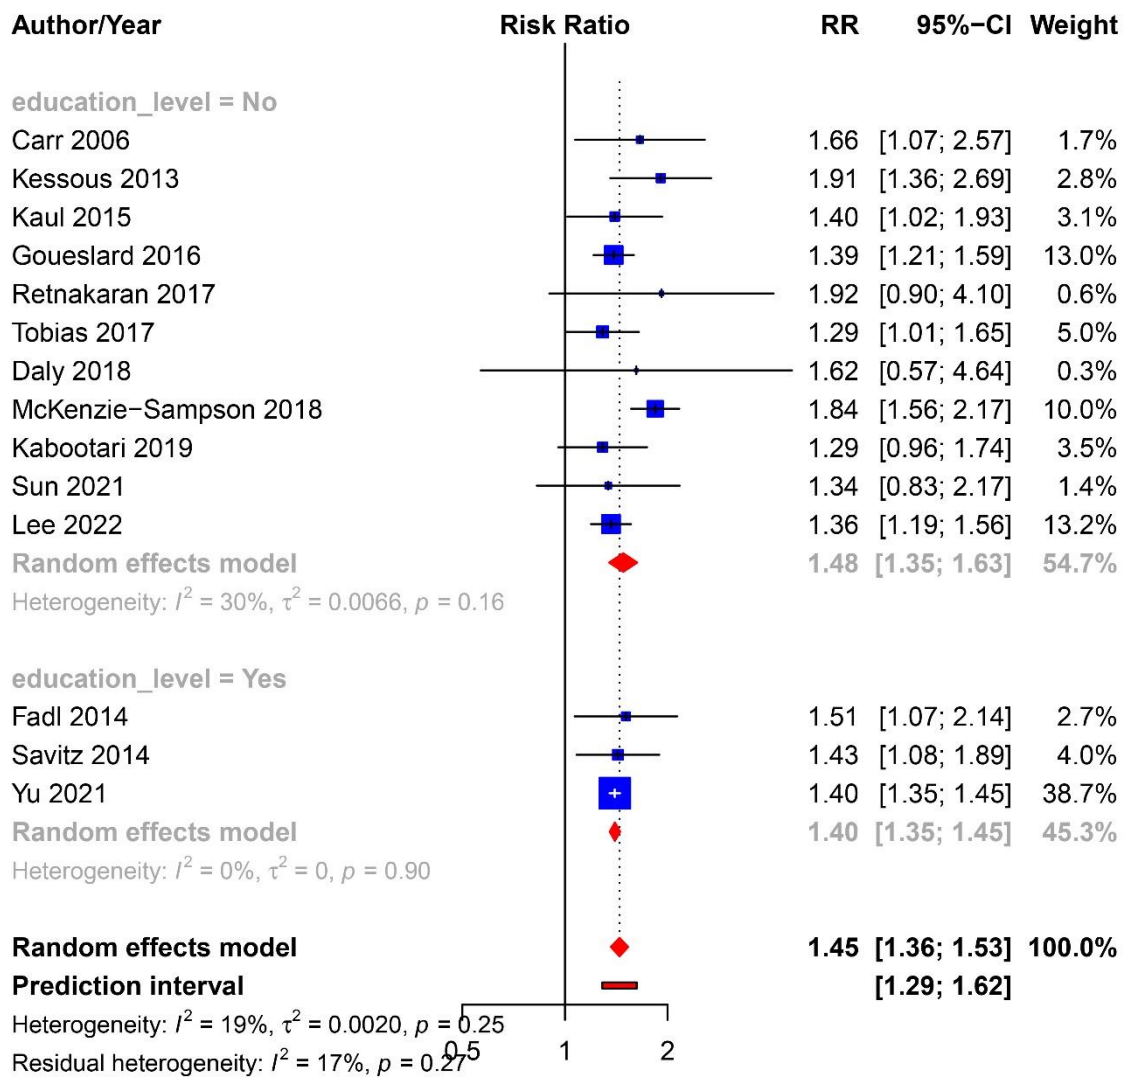

**Figure S31.** Subgroup analyses of the association between gestational diabetes mellitus and overall cardiovascular and cerebrovascular diseases, according to adjustment of education level.

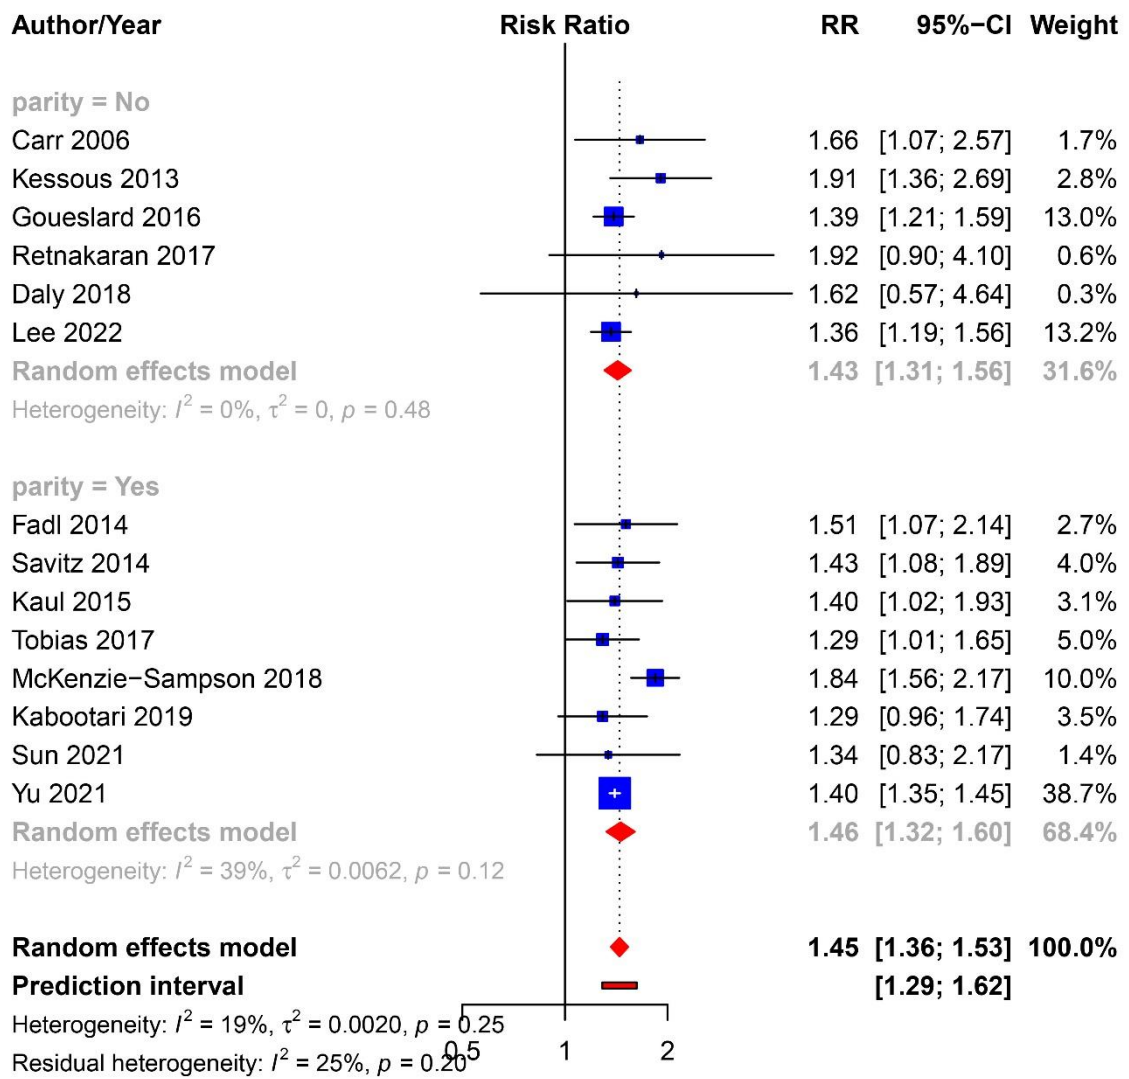

**Figure S32.** Subgroup analyses of the association between gestational diabetes mellitus and overall cardiovascular and cerebrovascular diseases, according to adjustment of parity.

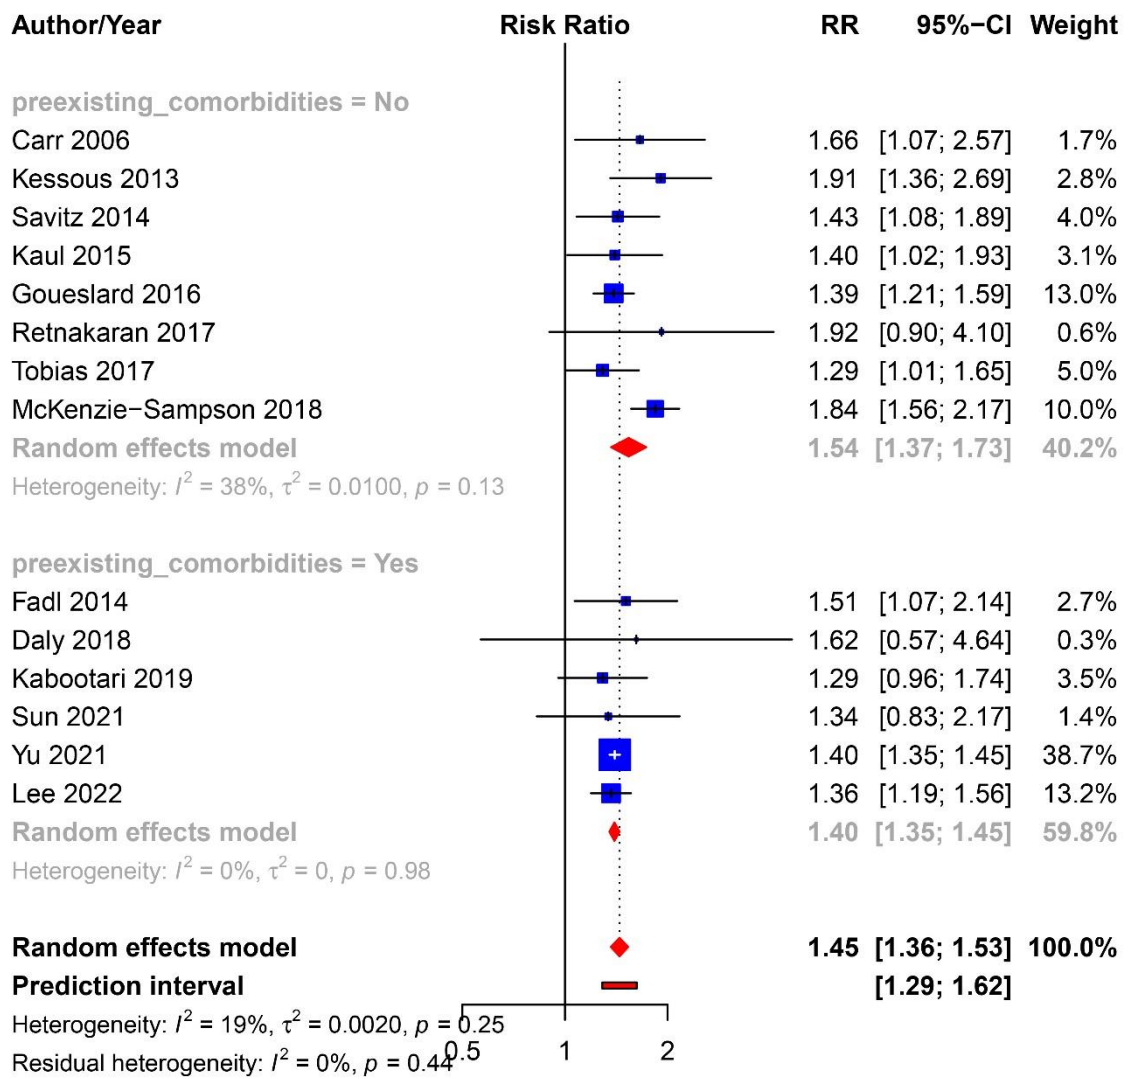

**Figure S33.** Subgroup analyses of the association between gestational diabetes mellitus and overall cardiovascular and cerebrovascular diseases, according to adjustment of comorbidities.



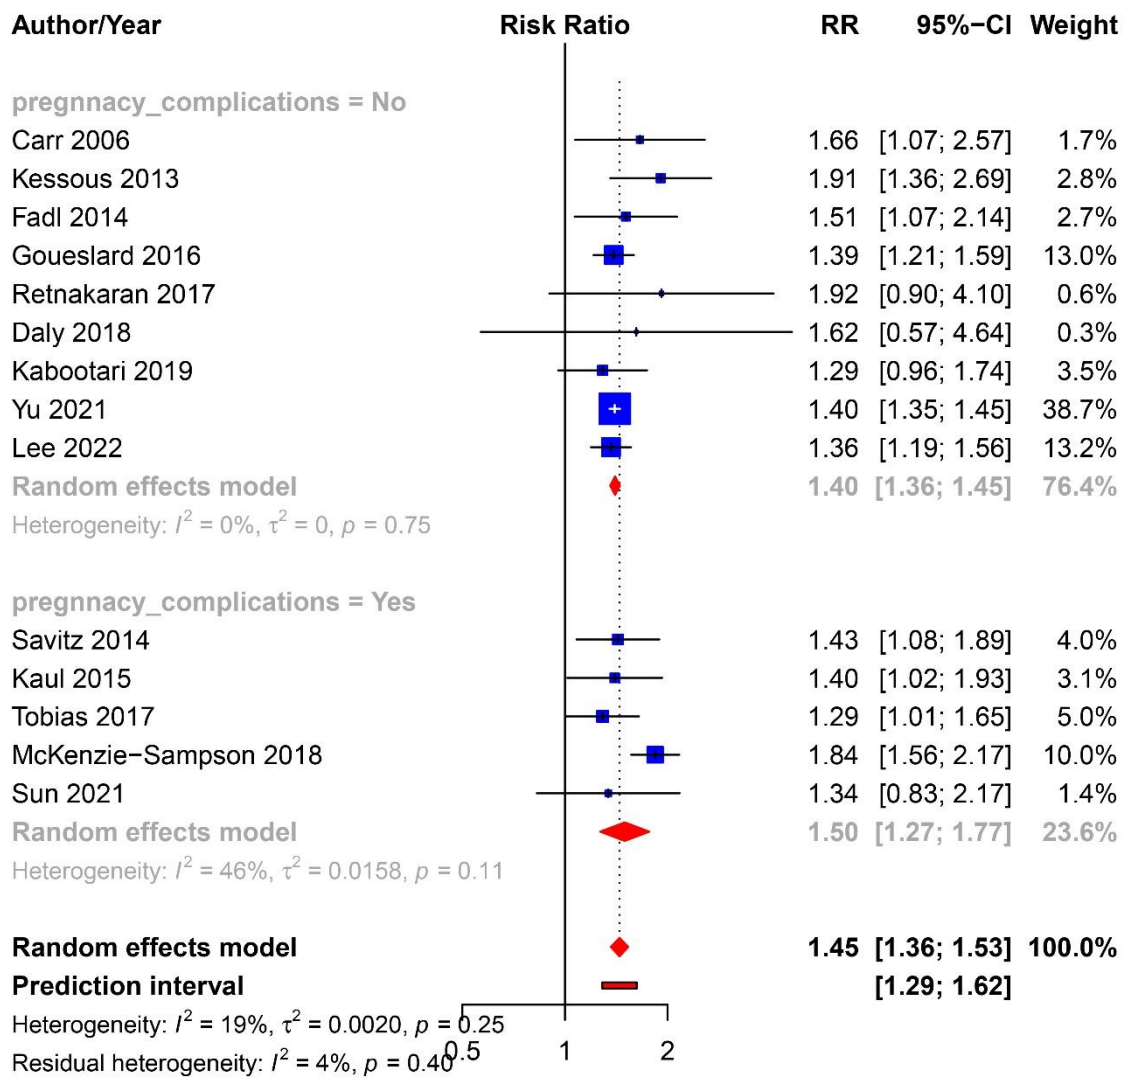

**Figure S34.** Subgroup analyses of the association between gestational diabetes mellitus and overall cardiovascular and cerebrovascular diseases, according to adjustment of pregnancy complications.

## **Appendix S1. Updated Study protocol**

### **Title**

Association of Gestational Diabetes Mellitus with Overall and Type-Specific Cardiovascular and cerebrovascular Diseases: Systematic Review with Meta-Analysis Involving Over 8 Million Participants

### **Review question**

The risk of overall and type-specific cardiovascular and cerebrovascular diseases (CCVD) as well as venous thromboembolism in women with a history of gestational diabetes mellitus (GDM).

### **Searches**

EMBASE, PubMed, and Cochrane library from inception to from database inception to 1 November 2021 and updated on 26 May 2022 were performed.

### **URL to search strategy.**

(gestational diabetes OR gestational diabetes mellitus OR pregnancy diabetes OR pregnancy diabetes mellitus) AND (cardiovascular diseases OR cerebrovascular disorders OR venous thromboembolism OR cardiovascular OR cerebrovascular OR coronary artery disease\* OR coronary heart disease\* OR cardiac OR ischemic heart disease\* OR cardiovascular and cerebrovascular OR myocardial infarction OR heart failure OR angina pectoris OR cerebral OR stroke OR transient ischemic attack OR pulmonary embolism OR deep vein thrombosis)

### **Condition or domain being studied.**

Overall and Type-Specific Cardiovascular and cerebrovascular Diseases

### **Participants/population**

Cohort studies, case-control studies, reporting the relationship between GDM and incident CVD. Studies will be excluded as follows:

- 1) Replicated publications from the same cohort
- 2) Insufficient data
- 3) Case report, editorial, review
- 4) Nonhuman studies

### **Intervention(s), exposure(s)**

Our intervention of interest is the risk of overall and type-specific cardiovascular and cerebrovascular diseases.

### **Comparator(s)/control**

Control without GDM.

### **Types of study to be included.**

retrospective or prospective cohort studies, or case-control studies.

### **Context**

#### **Main outcome(s)**

- 1) The primary outcome was the association of GDM with all CVD, cardiovascular and cerebrovascular diseases.
- 2) The secondary outcomes were the association of GDM with type-specific cardiovascular, cerebrovascular diseases as well as VTE (including deep vein thrombosis and pulmonary embolism).

#### **Measures of effect**

Pooled risk ratio

#### **Additional outcome(s).**

Not applicable.

#### **Data extraction (selection and coding)**

The following data will be independently extracted by two authors by two reviewers (WX and YW) on an excel sheet

- 1) First author, publication year, country/countries, study design, data sources.
- 2) Sample size and time period of observations in the study,
- 3) patients' demographics and clinical characteristics.
- 5) Study outcomes including number of patients developing CVD.

#### **Risk of bias (quality) assessment**

The risk of bias of selected studies was assessed independently by 2 reviewers (WX and YW)

according to the Risk of Bias in Nonrandomized Studies of Interventions (ROBINS-I) tool. In brief, this tool consists of the following seven domains: (1) bias due to confounding; (2) bias due to selection of participants; (3) bias due to exposure assessment; (4) bias due to misclassification during follow-up; (5) bias due to missing data; (6) bias due to outcome assessment; and (7) bias due to selective reporting. For each domain, the reviewer's judgments were rated as low risk, moderate risk, serious risk, critical risk, and no information. Any discrepancies were handled by a senior investigator (ZZ).

#### **Strategy for data synthesis.**

Extracted data for meta-analysis was performed with Stata Statistical Software version 13.0 and RR statistical language version R 3.6.0. The P-values were two sided with significant level  $\alpha=0.05$ . Pooled RRs with 95% CIs were calculated as an effect measure using the random effect models (DerSimonian and Laird method) for determining the relationship between GDM and developing cardiovascular and cerebrovascular events. The HR and IRR were used as good estimators of RR to carry out the statistical estimations. Because the occurrence of CCVD in GDM patients was relatively low, the OR mathematically approximates the RRs. We selected risk estimates from the multivariate models that were fully adjusted for confounders. For the studies that only reported the risk estimates for type-specific CCVD however with absence of an overall CCVD, we summarized type-specific risk estimates by either fixed-effects or random-effects model based on the level of heterogeneity to obtain a combined risk estimates of the study, which was finally entered into the main pooled analysis [15]. The heterogeneity across studies was quantify by  $I^2$  statistic (0-25% represents low heterogeneity, 25-50% moderate heterogeneity, 50-75% substantial heterogeneity, 75-100% high heterogeneity). Potential publication bias was assessed by visualization of funnel plot ( $\geq 10$  included studies) in combination with both Egger's test and Begg's test.

#### **Analysis of subgroups or subsets.**

To identify the subgroup differences and potential sources of the observed heterogeneity, subgroup analyses were carried out after stratifying for median year of publication (before 2017 vs after 2017), study location (North America vs Europe vs Asia), study design (prospective vs retrospective), source of data (nationwide vs non-nationwide), median follow-up duration ( $>10$  years vs  $\leq 10$  years), method of ascertainment of GDM (diagnostic code vs. self-report vs. oral glucose tolerance test [OGTT]), method of ascertainment of CCVD (diagnostic code vs. others), median sample size ( $\geq 100,000$  vs  $< 100,000$ ), number of CCVD events ( $\geq 2,500$  vs  $< 2,500$ ), and quality of study (moderate vs serious risk of bias). Meanwhile, to explore whether the association of GDM with CCVD was influenced by potential confounders, we performed additional analyses, stratified by a variety of adjustments, including race, smoking, body mass index, socio-economic status, education level, parity, preexisting comorbidities, the presence of pregnancy complications. A difference between the estimates of these subgroups was considered significant for a P-value less than  $<0.10$ . In addition, to assess the role of subsequent diabetes in the association between GDM and CCVD, we further analyzed the risk estimate for CCVD in all GDM patients and GDM patients who did not develop future overt diabetes. To evaluate the robustness of pooled results, sensitivity analyses were conducted by excluding each study one by one, excluding the case-control study and exclusively including the studies with direct risk estimates for overall CCVD.

#### **Type and method of review**

Meta-analysis, Systematic review

#### **Language**

No restriction

## Appendix 2. Protocol deviations

| <b>Section</b>                   | <b>Previous Protocol</b>                                                                                                                                              | <b>Publication</b>                                                                                                                                                                                                                                                                                                                                             |
|----------------------------------|-----------------------------------------------------------------------------------------------------------------------------------------------------------------------|----------------------------------------------------------------------------------------------------------------------------------------------------------------------------------------------------------------------------------------------------------------------------------------------------------------------------------------------------------------|
| Title                            | Association of Gestational Diabetes Mellitus with Overall and Type-Specific Cardiovascular and cerebrovascular Diseases: Systematic Review with Meta-Analysis         | Association of Gestational Diabetes Mellitus with Overall and Type-Specific Cardiovascular and cerebrovascular Diseases: Systematic Review with Meta-Analysis Involving Over 8 Million Participants                                                                                                                                                            |
| Authors                          | Wenhui Xie, Yu Wang, Shiyu Xiao, Lin Qiu, Yang Yu                                                                                                                     | Wenhui Xie, Yu Wang, Shiyu Xiao, Lin Qiu, Yang Yu, Zhuoli Zhang                                                                                                                                                                                                                                                                                                |
| Literature search                | A literature search was performed using the electronic databases PubMed, EMBASE and the Cochrane Library from database inception to from inception to 1 November 2021 | EMBASE, PubMed, and Cochrane library from inception to from database inception to 1 November 2021 and updated on 26 May 2022 were performed.                                                                                                                                                                                                                   |
| Risk of bias appraisal           | The Newcastle-Ottawa Scale                                                                                                                                            | Risk of Bias in Nonrandomized Studies of Interventions (ROBINS-I) tool                                                                                                                                                                                                                                                                                         |
| Strategy for data synthesis      | /                                                                                                                                                                     | For the studies that only reported the risk estimates for type-specific CCVD however with absence of an overall CCVD, we summarized type-specific risk estimates by either fixed-effects or random-effects model based on the level of heterogeneity to obtain a combined risk estimates of the study, which was finally entered into the main pooled analysis |
| Strategy for data synthesis      | Extracted data for meta-analysis was performed with Stata Statistical Software version 13.0                                                                           | Extracted data for meta-analysis was performed with Stata Statistical Software version 13.0 and RR statistical language version R 3.6.0.                                                                                                                                                                                                                       |
| Analysis of subgroups or subsets | Subgroup analyses were carried out by year of publication, study location, study design, source of data, follow-up duration, diagnosis of GDM, diagnosis              | To identify the subgroup differences and potential sources of the observed heterogeneity, subgroup analyses were carried out after stratifying for median                                                                                                                                                                                                      |

|  |                                                                                                                                                                                                                                                                                                                                                                                    |                                                                                                                                                                                                                                                                                                                                                                                                                                                                                                                                                                                                                                                                                                                                                                                                                                                                                                                                                                                                                                                               |
|--|------------------------------------------------------------------------------------------------------------------------------------------------------------------------------------------------------------------------------------------------------------------------------------------------------------------------------------------------------------------------------------|---------------------------------------------------------------------------------------------------------------------------------------------------------------------------------------------------------------------------------------------------------------------------------------------------------------------------------------------------------------------------------------------------------------------------------------------------------------------------------------------------------------------------------------------------------------------------------------------------------------------------------------------------------------------------------------------------------------------------------------------------------------------------------------------------------------------------------------------------------------------------------------------------------------------------------------------------------------------------------------------------------------------------------------------------------------|
|  | <p>of CVD, sample size and study quality. Moreover, to explore whether the association of GDM with CVD was influenced by potential confounders, we performed additional analyses, stratified by the adjustments, including race, smoking, body mass index, socio-economic status, education level, parity, preexisting comorbidities, the presence of pregnancy complications.</p> | <p>year of publication (before 2017 vs after 2017), study location (North America vs Europe vs Asia), study design (prospective vs retrospective), source of data (nationwide vs non-nationwide), median follow-up duration (&gt;10 years vs ≤ 10 years), method of ascertainment of GDM (diagnostic code vs. self-report vs. oral glucose tolerance test [OGTT]), method of ascertainment of CCVD (diagnostic code vs. others), median sample size (≥100,000 vs &lt; 100,000), number of CCVD events (≥2,500 vs &lt; 2,500), and quality of study (moderate vs serious risk of bias). Meanwhile, to explore whether the association of GDM with CCVD was influenced by potential confounders, we performed additional analyses, stratified by a variety of adjustments, including race, smoking, body mass index, socio-economic status, education level, parity, preexisting comorbidities, the presence of pregnancy complications. A difference between the estimates of these subgroups was considered significant for a P-value less than &lt;0.10.</p> |
|--|------------------------------------------------------------------------------------------------------------------------------------------------------------------------------------------------------------------------------------------------------------------------------------------------------------------------------------------------------------------------------------|---------------------------------------------------------------------------------------------------------------------------------------------------------------------------------------------------------------------------------------------------------------------------------------------------------------------------------------------------------------------------------------------------------------------------------------------------------------------------------------------------------------------------------------------------------------------------------------------------------------------------------------------------------------------------------------------------------------------------------------------------------------------------------------------------------------------------------------------------------------------------------------------------------------------------------------------------------------------------------------------------------------------------------------------------------------|

### Appendix S3. Search strategy

(gestational diabetes OR gestational diabetes mellitus OR pregnancy diabetes OR pregnancy diabetes mellitus) AND (cardiovascular diseases OR cerebrovascular disorders OR venous thromboembolism OR cardiovascular OR cerebrovascular OR coronary artery disease\* OR coronary heart disease\* OR cardiac OR ischemic heart disease\* OR cardiovascular and cerebrovascular OR myocardial infarction OR heart failure OR angina pectoris OR cerebral OR stroke OR transient ischemic attack OR pulmonary embolism OR deep vein thrombosis)

#### Pubmed 2022-5-26 11305

("diabetes, gestational"[MeSH Terms] OR ("diabetes"[All Fields] AND "gestational"[All Fields]) OR "gestational diabetes"[All Fields] OR ("gestational"[All Fields] AND "diabetes"[All Fields]) OR ("diabetes, gestational"[MeSH Terms] OR ("diabetes"[All Fields] AND "gestational"[All Fields]) OR "gestational diabetes"[All Fields] OR ("gestational"[All Fields] AND "diabetes"[All Fields] AND "mellitus"[All Fields]) OR "gestational diabetes mellitus"[All Fields]) OR ("pregnancy in diabetics"[MeSH Terms] OR ("pregnancy"[All Fields] AND "diabetics"[All Fields]) OR "pregnancy in diabetics"[All Fields] OR ("pregnancy"[All Fields] AND "diabetes"[All Fields]) OR "pregnancy diabetes"[All Fields]) OR ("pregnancy in diabetics"[MeSH Terms] OR ("pregnancy"[All Fields] AND "diabetics"[All Fields]) OR "pregnancy in diabetics"[All Fields] OR ("pregnancy"[All Fields] AND "diabetes"[All Fields] AND "mellitus"[All Fields]) OR "pregnancy diabetes mellitus"[All Fields])) AND ("cardiovascular diseases"[MeSH Terms] OR ("cardiovascular"[All Fields] AND "diseases"[All Fields]) OR "cardiovascular diseases"[All Fields] OR ("cerebrovascular disorders"[MeSH Terms] OR ("cerebrovascular"[All Fields] AND "disorders"[All Fields]) OR "cerebrovascular disorders"[All Fields]) OR ("venous thromboembolism"[MeSH Terms] OR ("venous"[All Fields] AND "thromboembolism"[All Fields]) OR "venous thromboembolism"[All Fields]) OR ("cardiovascular system"[MeSH Terms] OR ("cardiovascular"[All Fields] AND "system"[All Fields]) OR "cardiovascular system"[All Fields] OR "cardiovascular"[All Fields] OR "cardiovasculars"[All Fields]) OR "cerebrovascular"[All Fields] OR ("coronary vessels"[MeSH Terms] OR ("coronary"[All Fields] AND "vessels"[All Fields]) OR "coronary vessels"[All Fields] OR ("coronary"[All Fields] AND "artery"[All Fields]) OR "coronary artery"[All Fields] AND "disease\*" [All Fields]) OR ("coronaries"[All Fields] OR "heart"[MeSH Terms] OR "heart"[All Fields] OR "coronary"[All Fields]) AND ("heart"[MeSH Terms] OR "heart"[All Fields] OR "hearts"[All Fields] OR "heart s"[All Fields]) AND "disease\*" [All Fields]) OR ("cardiacs"[All Fields] OR "heart"[MeSH Terms] OR "heart"[All Fields] OR "cardiac"[All Fields]) OR ("ischaemics"[All Fields] OR "ischemia"[MeSH Terms] OR "ischemia"[All Fields] OR "ischaemic"[All Fields] OR "ischemic"[All Fields] OR "ischemical"[All Fields] OR "ischemically"[All Fields] OR "ischemics"[All Fields] OR "ischemized"[All Fields]) AND ("heart"[MeSH Terms] OR "heart"[All Fields] OR "hearts"[All Fields] OR "heart s"[All Fields]) AND "disease\*" [All Fields]) OR "cardiovascular and cerebrovascular"[All Fields] OR ("myocardial infarction"[MeSH Terms] OR ("myocardial"[All Fields] AND "infarction"[All Fields]) OR "myocardial infarction"[All Fields]) OR ("heart failure"[MeSH Terms] OR ("heart"[All Fields] AND "failure"[All Fields]) OR "heart failure"[All Fields]) OR ("angina pectoris"[MeSH Terms] OR ("angina"[All Fields] AND "pectoris"[All Fields]) OR "angina pectoris"[All Fields]) OR ("cerebrally"[All Fields] OR "cerebrum"[MeSH Terms] OR "cerebrum"[All Fields] OR "cerebral"[All Fields] OR "brain"[MeSH Terms] OR "brain"[All Fields]) OR ("stroke"[MeSH Terms] OR "stroke"[All Fields] OR "strokes"[All Fields] OR "stroke s"[All Fields]) OR ("transient ischaemic attack"[All Fields] OR "ischemic attack, transient"[MeSH Terms] OR ("ischemic"[All Fields] AND "attack"[All Fields] AND "transient"[All Fields]) OR "transient ischemic attack"[All Fields] OR ("transient"[All Fields] AND "ischemic"[All Fields] AND "attack"[All Fields])) OR ("pulmonary embolism"[MeSH Terms] OR ("pulmonary"[All Fields] AND "embolism"[All Fields]) OR "pulmonary embolism"[All Fields]) OR ("venous thrombosis"[MeSH Terms] OR ("venous"[All Fields] AND "thrombosis"[All Fields]) OR "venous thrombosis"[All Fields] OR ("deep"[All Fields] AND "vein"[All Fields] AND "thrombosis"[All Fields]) OR "deep vein thrombosis"[All Fields]))

**EMBASE 2022-5-26 28536**

('gestational diabetes'/exp OR 'gestational diabetes' OR (gestational AND ('diabetes'/exp OR diabetes)) OR 'gestational diabetes mellitus'/exp OR 'gestational diabetes mellitus' OR (gestational AND ('diabetes'/exp OR diabetes) AND mellitus) OR 'pregnancy diabetes'/exp OR 'pregnancy diabetes' OR (('pregnancy'/exp OR pregnancy) AND ('diabetes'/exp OR diabetes)) OR 'pregnancy diabetes mellitus'/exp OR 'pregnancy diabetes mellitus' OR (('pregnancy'/exp OR pregnancy) AND ('diabetes'/exp OR diabetes) AND mellitus)) AND ('cardiovascular diseases'/exp OR 'cardiovascular diseases' OR (('cardiovascular'/exp OR cardiovascular) AND ('diseases'/exp OR diseases)) OR 'cerebrovascular disorders'/exp OR 'cerebrovascular disorders' OR (cerebrovascular AND ('disorders'/exp OR disorders)) OR 'venous thromboembolism'/exp OR 'venous thromboembolism' OR (venous AND ('thromboembolism'/exp OR thromboembolism)) OR 'cardiovascular'/exp OR cardiovascular OR cerebrovascular OR 'coronary artery'/exp OR 'coronary artery' OR (coronary AND ('artery'/exp OR artery) AND disease\*) OR 'coronary heart' OR (coronary AND ('heart'/exp OR heart) AND disease\*) OR cardiac OR 'ischemic heart'/exp OR 'ischemic heart' OR (ischemic AND ('heart'/exp OR heart) AND disease\*) OR 'cardio cerebrovascular' OR 'myocardial infarction'/exp OR 'myocardial infarction' OR (myocardial AND ('infarction'/exp OR infarction)) OR 'heart failure'/exp OR 'heart failure' OR (('heart'/exp OR heart) AND ('failure'/exp OR failure)) OR 'angina pectoris'/exp OR 'angina pectoris' OR (('angina'/exp OR angina) AND pectoris) OR cerebral OR 'stroke'/exp OR stroke OR 'transient ischemic attack'/exp OR 'transient ischemic attack' OR (transient AND ischemic AND attack) OR 'pulmonary embolism'/exp OR 'pulmonary embolism' OR (pulmonary AND ('embolism'/exp OR embolism)) OR 'deep vein thrombosis'/exp OR 'deep vein thrombosis' OR (deep AND ('vein'/exp OR vein) AND ('thrombosis'/exp OR thrombosis)))

**Cochrane library 2022-5-26 1070**

(gestational diabetes OR gestational diabetes mellitus OR pregnancy diabetes OR pregnancy diabetes mellitus) AND (cardiovascular diseases OR cerebrovascular disorders OR venous thromboembolism OR cardiovascular OR cerebrovascular OR coronary artery disease\* OR coronary heart disease\* OR cardiac OR ischemic heart disease\* OR cardiovascular and cerebrovascular OR myocardial infarction OR heart failure OR angina pectoris OR cerebral OR stroke OR transient ischemic attack OR pulmonary embolism OR deep vein thrombosis)

#### Appendix S4. Description and decision criteria for each domain in ROBINS-I

| Domain                                       | Explanation                                                                                                                                                                                                                                                                                                                                                                              | Judgments                                                                                                                                                                                                                                                                                                                                                                                                                                                                                                                                                                                                                                                                                                                                                                                                                                                                                                                                                                                                                                                                                                                                                          |
|----------------------------------------------|------------------------------------------------------------------------------------------------------------------------------------------------------------------------------------------------------------------------------------------------------------------------------------------------------------------------------------------------------------------------------------------|--------------------------------------------------------------------------------------------------------------------------------------------------------------------------------------------------------------------------------------------------------------------------------------------------------------------------------------------------------------------------------------------------------------------------------------------------------------------------------------------------------------------------------------------------------------------------------------------------------------------------------------------------------------------------------------------------------------------------------------------------------------------------------------------------------------------------------------------------------------------------------------------------------------------------------------------------------------------------------------------------------------------------------------------------------------------------------------------------------------------------------------------------------------------|
| <b>Bias due to confounding</b>               | <ul style="list-style-type: none"> <li>• Is there potential for confounding of the effect of exposure in this study?</li> <li>• Did the authors use a multivariable-adjusted analysis method that controlled at least for age, sex, smoking, physical activity, and body mass index?</li> <li>• Did the authors avoid adjusting for post-exposure variables?</li> </ul>                  | <p><u>Low risk of bias:</u> No bias expected due to confounding, including time-varying confounding.</p> <p><u>Moderate risk of bias:</u> Confounding is expected; including at least 5 factors of the following factors: age, smoking, body mass index (alternatively weight), comorbidities, maternal parity, race/ethnicity, others (socio-economic status, maternal education) and have been appropriately controlled for in a multivariable-adjusted analysis.</p> <p><u>Serious risk of bias:</u> 3-4 above-mentioned factors were measured or appropriately controlled for.</p> <p><u>Critical risk of bias:</u> less than 3 above-mentioned factors were measured or appropriately controlled for</p> <p><u>No information:</u> No information on which confounders have been controlled for.</p>                                                                                                                                                                                                                                                                                                                                                          |
| <b>Bias due to selection of participants</b> | <ul style="list-style-type: none"> <li>• Was the selection of participants into the study based on participant's characteristics observed after the start of the study/exposure assessment?</li> <li>• Do the start of follow-up and the start of exposure coincide for most participants? Were methods used that are likely to correct for the presence of selection biases?</li> </ul> | <p><u>Low risk of bias:</u> All participants who would have been eligible for the target study were included in the study (e.g. population-based study without special exclusion criteria).</p> <p><u>Moderate risk of bias:</u> Selection into the study may have been related to exposure and outcome, e.g., inclusion of GDM women with a family history of type 2 diabetes only; or exclusion of women with maternal risk factors (e.g. hypertension, heart disease, renal disease); <i>and</i> the authors used appropriate methods to correct for the selection bias;</p> <p><u>Serious risk of bias:</u> Selection into the study was related to exposure and outcome (e.g., only participants at higher risk of CCVD were included in the analysis); <i>and</i> this could not be corrected for in the analyses; <i>or</i> the start of follow-up and start of exposure do not coincide <i>and</i> the rate ratio is not constant over time.</p> <p><u>Critical risk of bias:</u> over half of included GDM patients having CCVD at baseline;</p> <p><u>No information:</u> No information is reported about selection of participants into the study.</p> |
| <b>Bias due to exposure assessment</b>       | <ul style="list-style-type: none"> <li>• Were exposure groups clearly defined and adequately assessed?</li> <li>• Was the information used to define the exposure groups based on reasonable a priori data?</li> </ul>                                                                                                                                                                   | <p><u>Low risk of bias:</u> GDM was well defined, according to OGTT or relevant guideline <i>and</i> no measurement error is expected in its assessment.</p> <p><u>Moderate risk of bias:</u> Exposure status is defined by diagnostic code (e.g. ICD) or by self-reported but measured by validated tool with satisfactory accuracy (<math>\geq 90\%</math>) (e.g. validated questionnaire).</p> <p><u>Serious risk of bias:</u> Exposure status is defined according to self-reported with unsatisfied accuracy (50-90%).</p> <p><u>Critical risk of bias:</u> Exposure status is defined according to self-reported with poor accuracy (less than 50%).</p> <p><u>No information:</u> No definition of exposure or no explanation of the source of information about</p>                                                                                                                                                                                                                                                                                                                                                                                        |



|                                                       |                                                                                                                                                                                                                                                                                                                                |                                                                                                                                                                                                                                                                                                                                                                                                                                                                                                                                                                                                                                                                                                                                                                                                                                                                                                                                                                                                                                                                                                   |
|-------------------------------------------------------|--------------------------------------------------------------------------------------------------------------------------------------------------------------------------------------------------------------------------------------------------------------------------------------------------------------------------------|---------------------------------------------------------------------------------------------------------------------------------------------------------------------------------------------------------------------------------------------------------------------------------------------------------------------------------------------------------------------------------------------------------------------------------------------------------------------------------------------------------------------------------------------------------------------------------------------------------------------------------------------------------------------------------------------------------------------------------------------------------------------------------------------------------------------------------------------------------------------------------------------------------------------------------------------------------------------------------------------------------------------------------------------------------------------------------------------------|
|                                                       |                                                                                                                                                                                                                                                                                                                                | exposure status is reported.                                                                                                                                                                                                                                                                                                                                                                                                                                                                                                                                                                                                                                                                                                                                                                                                                                                                                                                                                                                                                                                                      |
| <b>Bias due to misclassification during follow-up</b> | <ul style="list-style-type: none"> <li>• Were there deviations from the exposure beyond what would be expected in usual practice?</li> <li>• Were these deviations unbalanced between groups and likely to have affected the outcome?</li> </ul>                                                                               | <p><u>Low risk of bias:</u> Repeated measurements of the exposure status during follow-up are available. No or only slight changes in fat intake were observed and the changes were considered in the analysis.</p> <p><u>Moderate risk of bias:</u> Repeated measurements of the exposure are not available, but high changes are not expected during follow-up (compare notes) or repeated measurements of the exposure status during follow-up are available and some changes in lifestyle factors were observed. The analysis was appropriate to estimate the effect of changes in lifestyle factors, allowing for deviations that were likely to impact the outcome;</p> <p><u>Serious or critical risk of bias:</u> Exposure status is measured during follow-up and high changes in lifestyle factors have been observed, and the analysis was not appropriate to estimate the effect of changes in lifestyle factors, allowing for deviations that were likely to impact the outcome.</p> <p><u>No information:</u> No information on deviations from the exposure is reported.</p>       |
| <b>Bias due to missing data</b>                       | <ul style="list-style-type: none"> <li>• Were there missing outcome data?</li> <li>• Were participants excluded due to missing data on exposure status?</li> <li>• Were participants excluded due to missing data on other variables needed for analysis?</li> </ul>                                                           | <p><u>Low risk of bias:</u> Little loss-to-follow-up (&lt;20%) and data on exposure and other variables were reasonably complete (&lt;10% missing data) and was unlikely to introduce bias; <i>or</i> the analysis addressed missing data and is likely to have removed any risk of bias.</p> <p><u>Moderate risk of bias:</u> There is a proportion of missing data in the original cohort or a high proportion of loss-to-follow-up; <i>and</i> the analysis is unlikely to have removed the risk of bias arising from the missing data (e.g., using logistic regression).</p> <p><u>Serious or critical risk of bias:</u> High proportions (&gt;50%) of missing data; <i>and</i> the analysis is unlikely to have removed the risk of bias arising from the missing data; <i>or</i> missing data were addressed inappropriately in the analysis; <i>or</i> the nature of the missing data means that the risk of bias cannot be removed through appropriate analysis.</p> <p><u>No information:</u> No information is reported about missing data or the potential for data to be missing.</p> |
| <b>Bias due to measurement of the outcome</b>         | <ul style="list-style-type: none"> <li>• Could the outcome measure have been influenced by knowledge of the exposure status?</li> <li>• Were the methods of outcome assessment comparable across exposure groups?</li> <li>• Was any systematic error in the measurement of the outcome related to exposure status?</li> </ul> | <p><u>Low risk of bias:</u> The methods of outcome assessment were comparable across exposure groups; <i>and</i> the outcome measure was unlikely to be influenced by knowledge of the exposure status of study participants; <i>and</i> any error in measuring the outcome is unrelated to exposure status (i.e., objective measures such as confirmed medical records, record linkage).</p> <p><u>Moderate risk of bias:</u> The methods of outcome assessment were comparable across exposure groups; <i>and</i> any error in measuring the outcome may be minimally related to exposure status <i>or</i> if the outcome measure was not reliably measured (i.e. confirmed records are not available for the whole study population).</p> <p><u>Serious or critical risk of bias:</u> The methods of outcome assessment were not comparable across exposure groups; <i>or</i> the outcome measure was subjective (i.e., self-report of type 2 diabetes by study participants); <i>and</i> error in measuring the outcome was related to exposure status.</p>                                   |

|                                                       |                                                                                                                                                                                                                                                                   |                                                                                                                                                                                                                                                                                                                                                                                                                                                                                                                                                                                                                                                                                                                                                                                                                                                                                                             |
|-------------------------------------------------------|-------------------------------------------------------------------------------------------------------------------------------------------------------------------------------------------------------------------------------------------------------------------|-------------------------------------------------------------------------------------------------------------------------------------------------------------------------------------------------------------------------------------------------------------------------------------------------------------------------------------------------------------------------------------------------------------------------------------------------------------------------------------------------------------------------------------------------------------------------------------------------------------------------------------------------------------------------------------------------------------------------------------------------------------------------------------------------------------------------------------------------------------------------------------------------------------|
|                                                       |                                                                                                                                                                                                                                                                   | <u>No information</u> : No information is reported about the methods of outcome assessment.                                                                                                                                                                                                                                                                                                                                                                                                                                                                                                                                                                                                                                                                                                                                                                                                                 |
| <b>Bias due to selective reporting of the results</b> | <ul style="list-style-type: none"> <li>• Is the reported effect estimate likely to be selected from multiple analyses of the exposure-outcome relationship?</li> <li>• Is the reported effect estimate likely to be selected from different subgroups?</li> </ul> | <p><u>Low risk of bias</u>: There is a clear description of all analyses and the analyses are consistent and all reported results correspond to all intended outcomes, analyses and sub-cohorts.</p> <p><u>Moderate risk of bias</u>: The analyses are clearly defined; <i>and</i> there is an indication of selection of the reported analysis from among multiple analyses; <i>and</i> there is an indication of selection of the cohort or subgroups for analysis and reporting on the basis of the results (e.g., estimates not shown for all analyses).</p> <p><u>Serious or critical risk of bias</u>: There is a high risk of selective reporting from among multiple analyses; <i>or</i> the cohort or subgroup is selected from a larger study for analysis and appears to be reported based on the results.</p> <p><u>No information</u>: There is too little information to make a judgment.</p> |
| <b>Overall judgment</b>                               | Low risk of bias                                                                                                                                                                                                                                                  | The study is judged to be at a low risk of bias for all domains.                                                                                                                                                                                                                                                                                                                                                                                                                                                                                                                                                                                                                                                                                                                                                                                                                                            |
|                                                       | Moderate risk of bias                                                                                                                                                                                                                                             | The study is judged to be at low or moderate risk of bias for all domains.                                                                                                                                                                                                                                                                                                                                                                                                                                                                                                                                                                                                                                                                                                                                                                                                                                  |
|                                                       | Serious risk of bias                                                                                                                                                                                                                                              | The study is judged to be at serious risk of bias in at least one domain, but not at critical risk in any domain.                                                                                                                                                                                                                                                                                                                                                                                                                                                                                                                                                                                                                                                                                                                                                                                           |

## Appendix S5. List of excluded studies

### Ineligible population (n= 21)

1. Kul Ş, Güvenç TS, Baycan ÖF, Çelik FB, Çalışkan Z, Çetin Güvenç R, Çiftçi FC, Caliskan M. Combined past preeclampsia and gestational diabetes is associated with a very high frequency of coronary microvascular dysfunction. *Microvasc Res.* 2021 Mar;134:104104. doi: 10.1016/j.mvr.2020.104104.
2. Aslam A, Perera S, Watts M, Kaye D, Layland J, Nicholls SJ, Cameron J, Zaman S. Previous Pre-Eclampsia, Gestational Diabetes and Hypertension Place Women at High Cardiovascular Risk: But Do We Ask? *Heart Lung Circ.* 2021 Jan;30(1):154-157. doi: 10.1016/j.hlc.2020.06.022.
3. Wacker-Gussmann A, Schopen J, Engelhard J, Sitzberger C, Lienert N, Ewert P, Müller A, Schmidt G, Oberhoffer-Fritz R, Lobmaier SM. The Impact of Gestational Diabetes in Pregnancy on the Cardiovascular System of Children at One Year of Age. *J Clin Med.* 2021 Dec 13;10(24):5839. doi: 10.3390/jcm10245839.
4. Henriksson P, Sandborg J, Söderström E, Leppänen MH, Snekenes V, Blomberg M, Ortega FB, Löf M. Associations of body composition and physical fitness with gestational diabetes and cardiovascular health in pregnancy: Results from the HealthyMoms trial. *Nutr Diabetes.* 2021 Jun 7;11(1):16. doi: 10.1038/s41387-021-00158-z.
5. Espinoza C, Fuenzalida B, Leiva A. Increased Fetal Cardiovascular Disease Risk: Potential Synergy Between Gestational Diabetes Mellitus and Maternal Hypercholesterolemia. *Curr Vasc Pharmacol.* 2021;19(6):601-623. doi: 10.2174/157016119666210423085407.
6. Perng W, Hockett CW, Sauder KA, Dabelea D. In utero exposure to gestational diabetes mellitus and cardiovascular risk factors in youth: A longitudinal analysis in the EPOCH cohort. *Pediatr Obes.* 2020 May;15(5):e12611. doi: 10.1111/ijpo.12611.
7. Moe K, Sugulle M, Dechend R, Staff AC. Risk prediction of maternal cardiovascular disease one year after hypertensive pregnancy complications or gestational diabetes mellitus. *Eur J Prev Cardiol.* 2020 Aug;27(12):1273-1283. doi: 10.1177/2047487319879791.
8. Litwin L, Sundholm JKM, Rönö K, Koivusalo SB, Eriksson JG, Sarkola T. No effect of gestational diabetes or pre-gestational obesity on 6-year offspring left ventricular function-RADIEL study follow-up. *Acta Diabetol.* 2020 Dec;57(12):1463-1472. doi: 10.1007/s00592-020-01571-z.
9. Neimark E, Wainstock T, Sheiner E, Fischer L, Pariente G. Long-term cardiovascular hospitalizations of small for gestational age (SGA) offspring born to women with and without gestational diabetes mellitus (GDM) ‡. *Gynecol Endocrinol.* 2019 Jun;35(6):518-524. doi: 10.1080/09513590.2018.1541233.
10. Sandsæter HL, Horn J, Rich-Edwards JW, Haugdahl HS. Preeclampsia, gestational diabetes and later risk of cardiovascular disease: Women's experiences and motivation for lifestyle changes explored in focus group interviews. *BMC Pregnancy Childbirth.* 2019 Nov 27;19(1):448. doi: 10.1186/s12884-019-2591-1.
11. Yefet E, Schwartz N, Sliman B, Ishay A, Nachum Z. Good glycemic control of gestational diabetes mellitus is associated with the attenuation of future maternal cardiovascular risk: a retrospective cohort study. *Cardiovasc Diabetol.* 2019 Jun 5;18(1):75. doi: 10.1186/s12933-019-0881-6.
12. Ukah U.V. , Dayan N. , Auger N. , Platt R. Factors associated with future cardiovascular disease in women with hypertensive disorders of pregnancy and gestational diabetes. *Hypertension* 2019 74 Supplement 1.
13. Pariente G. , Wainstock T. , Landau D. , Sheiner E. Long-term cardiovascular outcome of small for gestational age infants born to women with and without gestational diabetes mellitus. *American Journal of Obstetrics and Gynecology* 2018 218:1 (S573) Supplement 1.
14. Leybovitz-Haleluya N, Wainstock T, Landau D, Sheiner E. Maternal gestational diabetes mellitus and the risk of subsequent pediatric cardiovascular diseases of the offspring: a population-based cohort study with up to 18 years of follow up. *Acta Diabetol.* 2018 Oct;55(10):1037-1042. doi: 10.1007/s00592-018-1176-1.
15. Pace R, Brazeau AS, Meltzer S, Rahme E, Dasgupta K. Conjoint Associations of Gestational Diabetes and Hypertension With Diabetes, Hypertension, and Cardiovascular Disease in Parents: A Retrospective Cohort Study. *Am J Epidemiol.* 2017 Nov 15;186(10):1115-1124. doi:

- 10.1093/aje/kwx263.
16. Pace R, Brazeau AS, Meltzer S, Rahme E, Dasgupta K. Conjoint Associations of Gestational Diabetes and Hypertension With Diabetes, Hypertension, and Cardiovascular Disease in Parents: A Retrospective Cohort Study. *Am J Epidemiol*. 2017 Nov 15;186(10):1115-1124. doi: 10.1093/aje/kwx263.
  17. Shostrom DCV, Sun Y, Oleson JJ, Snetselaar LG, Bao W. History of Gestational Diabetes Mellitus in Relation to Cardiovascular Disease and Cardiovascular Risk Factors in US Women. *Front Endocrinol (Lausanne)*. 2017 Jun 26;8:144. doi: 10.3389/fendo.2017.00144.
  18. Kizilgul M, Kan S, Beysel S, Apaydin M, Ozcelik O, Caliskan M, Ozbek M, Ozdemir S, Cakal E. Is fibroblast growth factor 23 a new cardiovascular risk marker in gestational diabetes? *Arch Endocrinol Metab*. 2017 Dec;61(6):562-566. doi: 10.1590/2359-3997000000287.
  19. Abokaf H., Shoham-Vardi I., Sergeenko R., Spiegel E., Landau D., Sheiner E. Gestational diabetes mellitus as an independent risk factor for long-term pediatric cardiovascular morbidity of the offspring. *American Journal of Obstetrics and Gynecology* 2016 214:1 SUPPL. 1 (S239-S240).
  20. Krishnaveni GV, Veena SR, Jones A, Srinivasan K, Osmond C, Karat SC, Kurpad AV, Fall CH. Exposure to maternal gestational diabetes is associated with higher cardiovascular responses to stress in adolescent Indians. *J Clin Endocrinol Metab*. 2015 Mar;100(3):986-93. doi: 10.1210/jc.2014-3239.
  21. Stuart A, Amer-Wählin I, Persson J, Källen K. Long-term cardiovascular risk in relation to birth weight and exposure to maternal diabetes mellitus. *Int J Cardiol*. 2013 Oct 3;168(3):2653-7. doi: 10.1016/j.ijcard.2013.03.032.

**No outcome of interest (n= 16)**

1. Dorans KS, Bazzano LA, Li X, Bundy JD, Tian L, He J. Lifestyle behaviors and cardiovascular risk profiles among parous women by gestational diabetes status, 2007-2018. *Nutr Metab Cardiovasc Dis*. 2022 May;32(5):1121-1130. doi: 10.1016/j.numecd.2022.01.012. Epub 2022 Jan 13.
2. He XL, Hu XJ, Luo BY, Xia YY, Zhang T, Saffery R, De Seymour J, Zou Z, Xu G, Zhao X, Qi HB, Han TL, Zhang H, Baker PN. The effects of gestational diabetes mellitus with maternal age between 35 and 40 years on the metabolite profiles of plasma and urine. *BMC Pregnancy Childbirth*. 2022 Mar 2;22(1):174. doi: 10.1186/s12884-022-04416-5.
3. Anzoategui S, Gibbone E, Wright A, Nicolaidis KH, Charakida M. Mid-gestation cardiovascular phenotype in women who develop gestational diabetes and hypertensive disorders of pregnancy: comparative study. *Ultrasound Obstet Gynecol*. 2022 May 2. doi: 10.1002/uog.24929.
4. Gunderson EP, Sun B, Catov JM, Carnethon M, Lewis CE, Allen NB, Sidney S, Wellons M, Rana JS, Hou L, Carr JJ. Gestational Diabetes History and Glucose Tolerance After Pregnancy Associated With Coronary Artery Calcium in Women During Midlife: The CARDIA Study. *Circulation*. 2021 Mar 9;143(10):974-987. doi: 10.1161/CIRCULATIONAHA.120.047320.
5. Gibbone E, Wright A, Campos RV, Anzoategui S, Nicolaidis KH, Charakida M. Maternal cardiac function at 19-23 weeks' gestation in prediction of gestational diabetes mellitus. *Ultrasound Obstet Gynecol*. 2021 Jul;58(1):77-82. doi: 10.1002/uog.23589.
6. Shroff GR, Sanchez OA, Miedema MD, Kramer H, Ix JH, Duprez DA, Jacobs DR Jr. Coronary artery calcium progresses rapidly and discriminates incident cardiovascular events in chronic kidney disease regardless of diabetes: The Multi-Ethnic Study of Atherosclerosis (MESA). *Atherosclerosis*. 2020 Oct;310:75-82. doi: 10.1016/j.atherosclerosis.2020.07.026.
7. Sitzberger C, Oberhoffer-Fritz R, Meyle K, Wagner M, Lienert N, Graupner O, Ensenauer R, Lobmaier SM, Wacker-Gußmann A. Gestational Diabetes: Physical Activity Before Pregnancy and Its Influence on the Cardiovascular System. *Front Pediatr*. 2020 Aug 14;8:465. doi: 10.3389/fped.2020.00465.
8. Aguilera J, Semmler J, Coronel C, Georgiopoulos G, Simpson J, Nicolaidis KH, Charakida M. Paired maternal and fetal cardiac functional measurements in women with gestational diabetes mellitus at 35-36 weeks' gestation. *Am J Obstet Gynecol*. 2020 Oct;223(4):574.e1-574.e15. doi: 10.1016/j.ajog.2020.04.019.
9. Hromadnikova I, Kotlabova K, Dvorakova L, Krofta L. Diabetes Mellitus and Cardiovascular Risk Assessment in Mothers with a History of Gestational Diabetes Mellitus Based on

Postpartal Expression Profile of MicroRNAs Associated with Diabetes Mellitus and Cardiovascular and Cerebrovascular Diseases. *Int J Mol Sci.* 2020 Mar 31;21(7):2437. doi: 10.3390/ijms21072437.

10. Buddeberg BS, Sharma R, O'Driscoll JM, Kaelin Agten A, Khalil A, Thilaganathan B. Impact of gestational diabetes mellitus on maternal cardiac adaptation to pregnancy. *Ultrasound Obstet Gynecol.* 2020 Aug;56(2):240-246. doi: 10.1002/uog.21941.
11. Sundholm JKM, Litwin L, Rönö K, Koivusalo SB, Eriksson JG, Sarkola T. Maternal obesity and gestational diabetes: Impact on arterial wall layer thickness and stiffness in early childhood - RADIEL study six-year follow-up. *Atherosclerosis.* 2019 May;284:237-244. doi: 10.1016/j.atherosclerosis.2019.01.037.
12. Franzago M, Fraticelli F, Di Nicola M, Bianco F, Marchetti D, Celentano C, Liberati M, De Caterina R, Stuppia L, Vitacolonna E. Early Subclinical Atherosclerosis in Gestational Diabetes: The Predictive Role of Routine Biomarkers and Nutrigenetic Variants. *J Diabetes Res.* 2018 Dec 24;2018:9242579. doi: 10.1155/2018/9242579.
13. Kintiraki E, Dipla K, Triantafyllou A, Koletsos N, Grigoriadou I, Poulakos P, Sachpekidis V, Vrabas IS, Zafeiridis A, Bili E, Douma S, Goulis DG. Blunted cerebral oxygenation during exercise in women with gestational diabetes mellitus: associations with macrovascular function and cardiovascular risk factors. *Metabolism.* 2018 Jun;83:25-30. doi: 10.1016/j.metabol.2018.01.009.
14. Mai C, Hou M, Chen R, Duan D, Xu H, Lin X, Wen J, Lv L, Lei Q, Dipla K, Triantafyllou A, Grigoriadou I, Kintiraki E, Triantafyllou GA, Poulis P, Vrabas IS, Zafeiridis A, Douma S, Goulis DG. Impairments in microvascular function and skeletal muscle oxygenation in women with gestational diabetes mellitus: links to cardiovascular disease risk factors. *Diabetologia.* 2017 Jan;60(1):192-201. doi: 10.1007/s00125-016-4129-7.
15. Lekva T, Bollerslev J, Norwitz ER, Aukrust P, Henriksen T, Ueland T. Aortic Stiffness and Cardiovascular Risk in Women with Previous Gestational Diabetes Mellitus. *PLoS One.* 2015 Aug 26;10(8):e0136892. doi: 10.1371/journal.pone.0136892.
16. Niu J. Cardiovascular risk factors in Chinese women with a history of gestational diabetes mellitus. *Int J Clin Exp Med.* 2015 Nov 15;8(11):21694-8.

#### **Duplicate population (n= 15)**

1. Retnakaran R, Shah BR. Impact of pregnancy on the trajectories of cardiovascular risk factors in women with and without gestational diabetes. *Diabetes Obes Metab.* 2021 Oct;23(10):2364-2373. doi: 10.1111/dom.14479.
2. Barchilon-Tiosano L, Sheiner E, Wainstock T, Sergienko R, Okby-Cronin R. Long-term risk for maternal cardiovascular morbidities in twin pregnancies complicated with gestational diabetes mellitus - a retrospective cohort study†. *J Matern Fetal Neonatal Med.* 2021 Aug;34(16):2677-2681. doi: 10.1080/14767058.2019.1670805.
3. Qian F. , Tobias D.K. , Ley S.H. , Chavarro J. , Liu G. , Hinkle S.N. , Yeung E. , Mills J.L. , Liu A. , Sun Q. , Hu F. , Zhang C. Association of gestational diabetes with subclinical cardiovascular disease on echocardiogram and endothelial function testing. *Circulation* 2021 144:SUPPL 1.
4. Retnakaran R, Shah BR. Divergent Trajectories of Cardiovascular Risk Factors in the Years Before Pregnancy in Women With and Without Gestational Diabetes Mellitus: A Population-Based Study. *Diabetes Care.* 2020 Oct;43(10):2500-2508. doi: 10.2337/dc20-1037.
5. Okby R. , Barchilon L. , Wainstock T. , Sergienko R. , Sheiner E. Is there an association between gestational diabetes mellitus in twin pregnancies and long-term maternal cardiovascular morbidity? *American Journal of Obstetrics and Gynecology* 2018 218:1 (S574-S575) Supplement 1
6. Appiah D, Schreiner PJ, Gunderson EP, Konety SH, Jacobs DR Jr, Nwabuo CC, Ebong IA, Whitham HK, Goff DC Jr, Lima JA, Ku IA, Gidding SS. Association of Gestational Diabetes Mellitus With Left Ventricular Structure and Function: The CARDIA Study. *Diabetes Care.* 2016 Mar;39(3):400-7. doi: 10.2337/dc15-1759.
7. Tobias D.K., Stuart J., Bao W., Rimm E., Richedwards J., Manson J.E., Hu F.B., Zhang C. History of gestational diabetes mellitus (GDM) and long-term risk of cardiovascular disease (CVD) in a large prospective cohort of U.S. Women. *Diabetes* 2015 64 SUPPL. 1 (A371-A372)
8. Gunderson EP, Chiang V, Pletcher MJ, Jacobs DR, Quesenberry CP, Sidney S, Lewis CE.

- History of gestational diabetes mellitus and future risk of atherosclerosis in mid-life: the Coronary Artery Risk Development in Young Adults study. *J Am Heart Assoc.* 2014 Mar 12;3(2):e000490. doi: 10.1161/JAHA.113.000490.
9. Retnakaran R., Ye C., Hanley A., Sermer M., Connelly P., Zinman B., Hamilton J. Effect of maternal gestational diabetes on the cardiovascular risk factor profile of infants at 1 year of age. *Nutrition, Metabolism and Cardiovascular Diseases* 2013 23:12 (1175-1181)
  10. Kessous R., Shoham-Vardi I., Pariente G., Sheiner E. The association between gestational diabetes mellitus and long term maternal cardiovascular morbidity in a follow-up period of more than a decade. *American Journal of Obstetrics and Gynecology* 2013 208:1 SUPPL.1 (S132-).
  11. Schwarcz E., Fadl H., Östlund I., Magnusson A., Montgomery S., Hanson U. Gestational diabetes mellitus is a risk factor for future cardiovascular disease. *Diabetologia* 2011 54 SUPPL. 1 (S42-).
  12. Fadl HE, Ostlund IK, Magnuson AF, Hanson US. Maternal and neonatal outcomes and time trends of gestational diabetes mellitus in Sweden from 1991 to 2003. *Diabet Med.* 2010 Apr;27(4):436-41. doi: 10.1111/j.1464-5491.2010.02978.x.
  13. Gunderson EP, Jacobs DR Jr, Chiang V, Lewis CE, Feng J, Quesenberry CP Jr, Sidney S. Duration of lactation and incidence of the metabolic syndrome in women of reproductive age according to gestational diabetes mellitus status: a 20-Year prospective study in CARDIA (Coronary Artery Risk Development in Young Adults). *Diabetes.* 2010 Feb;59(2):495-504. doi: 10.2337/db09-1197.
  14. Shah BR, Retnakaran R, Booth GL. Increased risk of cardiovascular disease in young women following gestational diabetes mellitus. *Diabetes Care.* 2008 Aug;31(8):1668-9. doi: 10.2337/dc08-0706.
  15. Zhang S, Folsom AR, Flack JM, Liu K. Body fat distribution before pregnancy and gestational diabetes: findings from coronary artery risk development in young adults (CARDIA) study. *BMJ.* 1995 Oct 28;311(7013):1139-40. doi: 10.1136/bmj.311.7013.1139.

**No eligible control (n= 10)**

1. Nicklas JM, Rosner BA, Zera CA, Seely EW. Association Between Changes in Postpartum Weight and Waist Circumference and Changes in Cardiometabolic Risk Factors Among Women With Recent Gestational Diabetes. *Prev Chronic Dis.* 2019 Apr 18;16:E47. doi: 10.5888/pcd16.180308.
2. Perera MJ, Reina SA, Elfassy T, Potter JE, Sotres Alvarez D, Simon MA, Isasi CR, Stuebe AM, Schneiderman N, Llabre MM. Gestational diabetes and cardiovascular risk factors and disease in U.S. Hispanics/Latinas in the Hispanic Community Health Study/Study of Latinos (HCHS/SOL). *Women Health.* 2019 May-Jun;59(5):481-495. doi: 10.1080/03630242.2018.1500415.
3. Lekva T, Michelsen AE, Aukrust P, Henriksen T, Bollerslev J, Ueland T. Leptin and adiponectin as predictors of cardiovascular risk after gestational diabetes mellitus. *Cardiovasc Diabetol.* 2017 Jan 10;16(1):5. doi: 10.1186/s12933-016-0492-4.
4. Mołęda P., Fronczyk A., Safranow K., Majkowska L. Are women with a history of gestational diabetes, without any current weight or glucose metabolism disorders, at a higher risk of cardiovascular disease? *Diabetologia* 2016 59:1 Supplement 1 (S187-S188).
5. Mukerji G, McTavish S, Glenn A, Delos-Reyes F, Price J, Wu W, Harvey P, Lipscombe LL. An Innovative Home-Based Cardiovascular Lifestyle Prevention Program for Women With Recent Gestational Diabetes: A Pilot Feasibility Study. *Can J Diabetes.* 2015 Dec;39(6):445-50. doi: 10.1016/j.cjcd.2015.08.002.
6. Jones EJ, Peercy M, Woods JC, Parker SP, Jackson T, Mata SA, McCage S, Levkoff SE, Nicklas JM, Seely EW. Identifying postpartum intervention approaches to reduce cardiometabolic risk among American Indian women with prior gestational diabetes, Oklahoma, 2012-2013. *Prev Chronic Dis.* 2015 Apr 2;12:E45. doi: 10.5888/pcd12.140566.
7. Rivero K, Portal VL, Vieira M, Behle I. Prevalence of the impaired glucose metabolism and its association with risk factors for coronary artery disease in women with gestational diabetes. *Diabetes Res Clin Pract.* 2008 Mar;79(3):433-7. doi: 10.1016/j.diabres.2007.10.015.
8. Lee H, Jang HC, Park HK, Cho NH. Early manifestation of cardiovascular disease risk factors in offspring of mothers with previous history of gestational diabetes mellitus. *Diabetes Res*

- Clin Pract. 2007 Nov;78(2):238-45. doi: 10.1016/j.diabres.2007.03.023.
9. Pallardo LF, Herranz L, Martin-Vaquero P, Garcia-Ingelmo T, Grande C, Jañez M. Impaired fasting glucose and impaired glucose tolerance in women with prior gestational diabetes are associated with a different cardiovascular profile. *Diabetes Care*. 2003 Aug;26(8):2318-22. doi: 10.2337/diacare.26.8.2318.
  10. Kerényi Z, Stella P, Nádasdi A, Tabák AG, Tamás G. Association between cardiovascular autonomic neuropathy and multimetabolic syndrome in a special cohort of women with prior gestational diabetes mellitus. *Diabet Med*. 1999 Sep;16(9):794-5.

#### **Insufficient data (n= 8)**

1. Kostis J.B. , Zinonos S. , Kostis W.J. , Ali S. , Vakil D. , Cosgrove N.M. , Bachmann G. GESTATIONAL DIABETES AND RISK OF CARDIOVASCULAR DISEASE. *Journal of the American College of Cardiology* 2022 79:9 (1522) Supplement.
2. Wichmann JL, Takx RAP, Nunez JH, Vliegenthart R, Otani K, Litwin SE, Morris PB, De Cecco CN, Rosenberg RD, Bayer RR 2nd, Baumann S, Renker M, Vogl TJ, Wenger NK, Schoepf UJ. Relationship Between Pregnancy Complications and Subsequent Coronary Artery Disease Assessed by Coronary Computed Tomographic Angiography in Black Women. *Circ Cardiovasc Imaging*. 2019 Jul;12(7):e008754. doi: 10.1161/CIRCIMAGING.118.008754.
3. Sodhi NK, Nelson AL. Prevalence of glucose intolerance and metabolic syndrome within one year following delivery of a pregnancy complicated by gestational diabetes. *Contracept Reprod Med*. 2018 Nov 23;3:27. doi: 10.1186/s40834-018-0080-y.
4. Brawerman GM, Dolinsky VW. Therapies for gestational diabetes and their implications for maternal and offspring health: Evidence from human and animal studies. *Pharmacol Res*. 2018 Apr;130:52-73. doi: 10.1016/j.phrs.2018.02.002.
5. Kostis J.B. , Zinonos S. , Kostis W.J. , Ali S. , Vakil D. , Cosgrove N.M. , Bachmann G. GESTATIONAL DIABETES AND RISK OF CARDIOVASCULAR DISEASE. *Journal of the American College of Cardiology* 2022 79:9 (1522) Supplement.
6. Sokup A, Ruszkowska-Ciastek B, Walentowicz-Sadłacka M. Heterogeneity of cardiovascular risk factors profile in non-diabetic women 2-24 months post gestational diabetes mellitus. *Gynecol Endocrinol*. 2014 May;30(5):350-4. doi: 10.3109/09513590.2013.831830.
7. Pintaudo B. , Lucisano G. , D'Ettoire A. , Di Vieste G. , Lepore V. , Sacco M. , De Berardis G. , Scardapane M. , Rossi M.C. , Pellegrini F. , Tognoni G. , Nicolucci A. Association of stillbirth with type 2 diabetes development and future cardiovascular events in women with and without gestational diabetes: A population-based cohort study. *Diabetologia* 2014 57:1 (S72) SUPPL. 1
8. Shand AW, Bell JC, McElduff A, Morris J, Roberts CL. Outcomes of pregnancies in women with pre-gestational diabetes mellitus and gestational diabetes mellitus; a population-based study in New South Wales, Australia, 1998-2002. *Diabet Med*. 2008 Jun;25(6):708-15. doi: 10.1111/j.1464-5491.2008.02431.x.
9. Kim C, Cheng YJ, Beckles GL. Cardiovascular disease risk profiles in women with histories of gestational diabetes but without current diabetes. *Obstet Gynecol*. 2008 Oct;112(4):875-83. doi: 10.1097/AOG.0b013e31818638b5.

#### **Case report or series (n= 8)**

1. George AD, Gay MCL, Wlodek ME, Geddes DT. Breastfeeding a small for gestational age infant, complicated by maternal gestational diabetes: a case report. *BMC Pregnancy Childbirth*. 2019 Jun 21;19(1):210. doi: 10.1186/s12884-019-2366-8.
2. Geddes DT. Breastfeeding a small for gestational age infant, complicated by maternal gestational diabetes: a case report. *BMC Pregnancy Childbirth*. 2019 Jun 21;19(1):210. doi: 10.1186/s12884-019-2366-8.
3. Najmi A, Atal S, Sadasivam B, Singh P, Ray A. Early onset gestational diabetes mellitus: A case report and importance of early screening. *J Family Med Prim Care*. 2019 May;8(5):1772-1774. doi: 10.4103/jfmpe.jfmpe\_290\_19.
4. Kondo T, Nakamura M, Kitano S, Kawashima J, Matsumura T, Ohba T, Yamaguchi M, Katabuchi H, Araki E. The clinical course and pathophysiological investigation of adolescent gestational diabetes insipidus: a case report. *BMC Endocr Disord*. 2018 Jan 30;18(1):4. doi: 10.1186/s12902-018-0234-6.

5. Mor A, Fuchs Y, Zafra K, Haberman S, Tal R. Acute presentation of gestational diabetes insipidus with pre-eclampsia complicated by cerebral vasoconstriction: a case report and review of the published work. *J Obstet Gynaecol Res.* 2015 Aug;41(8):1269-72. doi: 10.1111/jog.12694.
6. Dawid G, Węgrzynowski J, Kwiatek M, Biczysko-Mokosa A, Petriczko E, Horodnicka-Józwa A. A fetal dilated and hypertrophic cardiomyopathy associated with maternal gestational diabetes--a case report. *Pediatr Endocrinol Diabetes Metab.* 2010;16(2):123-5.
7. Tancredi M, Marselli L, Lencioni C, Masini M, Bugliani M, Suleiman M, Masiello P, Boggi U, Filipponi F, Dotta F, Marchetti P, Di Cianni G. Histopathology and ex vivo insulin secretion of pancreatic islets in gestational diabetes: A case report. *Islets.* 2011 Sep-Oct;3(5):231-3. doi: 10.4161/isl.3.5.15940.
8. Sumathipala D, Gamage T, Wijesiriwardena B, Jayasekara RW, Dissanayake VH. An infant born to a mother with gestational diabetes presenting with 49,XXXXY syndrome and renal agenesis-a case report. *J Clin Res Pediatr Endocrinol.* 2012 Dec;4(4):223-5. doi: 10.4274/jcrpe.764. Epub 2012 Oct 2.

#### **Review, protocol (n= 6)**

1. Green JB. Cardiovascular Consequences of Gestational Diabetes. *Circulation.* 2021 Mar 9;143(10):988-990. doi: 10.1161/CIRCULATIONAHA.120.052995.
2. Kousta E, Kontogeorgi A, Robinson S, Johnston DG. Long-Term Metabolic Consequences in Patients with a History of Gestational Diabetes. *Curr Pharm Des.* 2020;26(43):5564-5572. doi: 10.2174/1381612826666201106092423.
3. Lorenzo-Almorós A, Hang T, Peiró C, Soriano-Guillén L, Egido J, Tuñón J, Lorenzo Ó. Predictive and diagnostic biomarkers for gestational diabetes and its associated metabolic and cardiovascular diseases. *Cardiovasc Diabetol.* 2019 Oct 30;18(1):140. doi: 10.1186/s12933-019-0935-9.
4. Farahvar S, Walfisch A, Sheiner E. Gestational diabetes risk factors and long-term consequences for both mother and offspring: a literature review. *Expert Rev Endocrinol Metab.* 2019 Jan;14(1):63-74. doi: 10.1080/17446651.2018.1476135.
5. Lind JM, Hennessy A, McLean M. Cardiovascular disease in women: the significance of hypertension and gestational diabetes during pregnancy. *Curr Opin Cardiol.* 2014 Sep;29(5):447-53. doi: 10.1097/HCO.0000000000000094.
6. Harreiter J, Dovjak G, Kautzky-Willer A. Gestational diabetes mellitus and cardiovascular risk after pregnancy. *Womens Health (Lond).* 2014 Jan;10(1):91-108. doi: 10.2217/whe.13.69.
